1 **Title; Expansive growths with uniaxial gradients can explain formation of oblong**  
2 **diversity observed in two-dimensional leaf shapes.**

3

4 **Running title; Oblong diversity by expansive growth.**

5

6 Akiko M. Nakamasu\*<sup>1</sup>

7 <sup>1</sup>International research organization for advanced science and technology (IROAST),  
8 Kumamoto University, 2-39-1 Kurokami Chuo-ku, Kumamoto, 860-8555, Japan

9 **\* Correspondence:** Akiko M. Nakamasu [akikonakamasu@gmail.com](mailto:akikonakamasu@gmail.com)

10 **Keywords:** Morphogenesis, Positional information, Robust development, Diversity, Simple  
11 leaf, Proportion.

12

## 1 **Summary statement**

2 Explanation of different responses against single positional information by different  
3 algorithms for two types of growth modes.

4

5

## 6 **Abstract**

7 Regulation of positional information in fields with different sizes are known as  
8 scaling in the area of morphogenesis, and enable integrated and robust developmental  
9 processes. Although it is known that interpretation of such scaled patterns leads to formations  
10 of relative shapes, the same positional information brings about diversities in morphogenesis.

11 In this research, a boundary of a two-dimensional shape was constructed by  
12 propagating points and segments connecting them for a description of a growing form. Cell  
13 expansion “with” or “without” cell proliferation were implemented using different simple  
14 algorithms, as “additive growth” and “expansive growth”, respectively. When the different  
15 types of growth algorithm with a biased restriction were calculated, the additive growth  
16 maintained a relative shape corresponding to the gradients with different lengths. However,  
17 diverse shapes were generated by the gradients in the cases of expansive growth and its  
18 combinations even with negate effects by additive growth. As an operative example of this  
19 attempt, leaf shapes with smooth margins were calculated using a combination of these  
20 growth algorithms.

21 Finally, we concluded that different algorithms brought different responses against the  
22 simple positional information, i.e., additive growth always governed by it or expansive  
23 growth can escape it. It was predicted theoretically that an expansive growth has a capacity to  
24 become a generator of diversity at least in leaf morphogenesis.

25

## 26 **Introduction**

27 Developmental processes are reproduced. For this purpose, a positional information  
28 need to be read out identically. It is well known that small pteus larvae can be obtained from  
29 half embryos of sea urchin (Driesch, 1892). Similar phenomena have also been observed in  
30 Salamandridae embryos (Spemann, 1938), among other organisms. Therefore, robust shaping  
31 can be achieved even with different sizes of positional information. If so, how we can obtaine  
32 diversity?

33 In the context of such regulative developments, dynamic adjustments of axial patterns  
34 to embryonic sizes have been reported (Cooke, 1981). Such regulation of positional  
35 information is known as “scaling” (Schmid-Nielsen, 1984). The mechanisms for the scaling  
36 of positional information have been treated theoretically (Murray, 2001), then investigated in  
37 several model systems on a molecular level as summarized in (Capek and Müller, 2019).

38 To obtain robust shape from such scaled patterns as positional information, relative  
39 shaping is needed during outline-shaping processes. Cell or tissue determination or  
40 differentiation processes based on positional information were also discussed theoretically as  
41 interpretation of French Flag by (Wolpart, 1969), and a biochemical analogue-to-digital  
42 converter by (Meinhardt, 1982), among others. Experimental systems, e.g., a proximo-distal  
43 sequence of cartilage structure in chick limbs (Summerbell, 1973; Morishita *et al.*, 2014), and  
44 insect legs, and so on were selected to address this problem. However, information regarding  
45 the robustness in two-dimensional outline-shaping processes is still insufficient.

46 Formations of plant leaves also follow the shaping robustness. However, at a same  
47 time, morphological diversities are derived from differences in positional information. For

1 example, it is known that a difference in the boundaries of basal growth zones influence on a  
2 leaf-shape complexity through a control of marginal outgrowths in their formation processes  
3 (Kierzkowski *et al.*, 2019). Then leaf-shape diversities can also be observed in simple leaves  
4 with an entire margin. For example, the diversity of foliage leaves even within a single plant  
5 is known as a heteroblasty in *Arabidopsis thaliana* (Tsukaya, 2000). Then the WOX related  
6 change in proportion was suggested in (Zhang *et al.*, 2020). Such diversities may also be  
7 obtained by similar differences in positional information. In this current work, we explore  
8 mechanisms by such proximodistal positional information might affect leaf morphogenesis.

9 In this research, a simple two-dimensional system of shape boundary was utilized for  
10 descriptions of growing forms, because of the complexity in three-dimensional  
11 morphogenesis including many information and events. The modeling of a leaf formation  
12 was tried in Kuchen *et al.*, 2012 as mentioned cell growth on blade other than peripheral, and  
13 importance of feedback effect was suggested in Hervieux *et al.*, 2016. The description of a  
14 shape boundary for simple leaf with serration was done in (Bilborough *et al.*, 2011). Then a  
15 similar boundary method constructed by propagating points and segments connecting  
16 adjacent points was previously proposed in (Nakamasu *et al.*, 2014).

17 In plant morphogenesis, that lack almost cell movements, different growth modes  
18 caused by cell expansions with or without cell proliferations mainly contribute to the  
19 resulting shapes. Therefore, effects of these biological events on a shape formation were  
20 expressed by simple algorithms as additive growth and expansive growth. A linear gradient  
21 starting from the base of a shape was set as the simplest positional information. Then the  
22 effects of difference in gradient lengths were investigated about the respective growth  
23 algorithms. Finally, as an operative example of a combination of these growth modes, leaf  
24 formations without the marginal indentations were calculated.

## 25 **Materials and methods**

### 26 **Algorithms for additive and expansive growth**

27 Follow a boundary propagation method (Sethian 1999) that is, space propagation over  
28 time for geometrical deformations, we utilize boundary description in this paper. In our  
29 method, a contour is expressed discretely (i.e., by segments and connection points of them)  
30 then propagation is applied iteratively by updating the connection points (Nakamasu *et al.*,  
31 2014). When the lengths of the segments exceed a threshold through the propagation, the  
32 segments are divided into two. The connection point  $P_{ij}(t) = (x_{ij}(t), y_{ij}(t))$  of the adjacent  
33  $i$ th and  $j$ th segments is displaced as  $P_{ij}' = VA_{ij}\vec{N}_{ij}$ . Here, for a description of the effect by  
34 cell proliferation,  $VA_{ij}(t)$  is a velocity and  $\vec{N}_{ij}(t)$  is a local unit vector on an apex pointing  
35 outward from a closed contour. (Fig. 1A). This rule for boundary movement is fundamentally  
36 different from Bilborough *et al.* 2011. The cell proliferation results in a local deformation,  
37 subsequently brings a hebetate protrusion. Such a shape can be observed in leaflets of  
38 *Eschscholzia californica* primordia with similar sizes of cells on the tips (i.e., they seem to be  
39 caused by cell proliferation) (Ikeuchi *et al.*, 2013). The value of  $VA_{ij}(t)$  is assumed to be  
40 affected by morphogen concentrations at that time, for example,  $u_i$  and  $u_j$  in adjacent  
41 segments on the contour and/or  $w_{xy}$  that is determined in a position unrestricted on the  
42 contour. In this research, it only depends on  $y$ , i.e.,  $w_y$ . Therefore, the growth speed at the  
43 point  $P_{ij}$  is determined as a function of  $(u_i + u_j)$  and/or  $w_y$ . For description of the growth  
44 caused by cell expansion without cell proliferation had been treated in (Nakamasu *et al.*,  
45

1 2017), though, for its biased case, the connection point  $P_{ij}(t)$  is propagated along the vector  
 2 from the geometrical center of the initial condition as  $P_{ij}' = VE_{ij}\overline{M}_{ij}$ . Here,  $\overline{M}_{ij}$  is defined  
 3 as the vector on each point in the direction mentioned above and with a length of the distance  
 4 from the origin is divided by a representative length  $l$  of the shape ( $l$  is the length of the  
 5 tallest vector) (Fig. 3A). Then  $VE_{ij}(t)$  is also affected by  $w_y$  in this research. Calculations  
 6 are done on the platform Wolfram Mathematica ver. 12.1.1. Then parameters  $\alpha$ s,  $\beta$ s, and  $\gamma$ s  
 7 utilized in simulations are shown in Table 1. Resulted shapes without bias are obtained in  
 8 every 5000 iterations then superimposed without alignment in Fig. 1B, J, Fig. 3B.

### 10 Analyses for biased growths

11 For a biased inhibition of the growth speed,  $w_y$  decreases linearly corresponding to  
 12 the  $y$ -coordinate from the base  $y_b(t)$ , and eventually drops to zero at the distal part of the  
 13 shape, as shown in Fig. 1C,

$$w_y = \begin{cases} 0 & ((y_{ij} - y_b)/\beta > 1) \\ 1 - (y_{ij} - y_b)/\beta & (0 \leq (y_{ij} - y_b)/\beta < 1) \end{cases} \quad (1)$$

14 Then,  $VA_{ij} = \alpha(1 - w_y)$  for an additive growth and  $VE_{ij} = \gamma(1 - w_y)$  for  
 15 expansive growth are utilized in this research. Both modes are constantly repressed by the  $y$   
 16 dependent linear gradient  $w_y$ , in the same form, but via different constants  $\alpha$  and  $\gamma$ ,  
 17 respectively. As an initial condition, a regular polygon composed of 10, or 20 nodes is  
 18 utilized. Resulted shapes are obtained in every 5000 iterations then superimposed aligning  
 19 the bottoms in Fig. 1D, F, and Fig. 2A-C, E-G, and Fig. 3D, F, H.

### 21 Simulation for leaf-like shapes

22 Following the methods of Harrison and Kolar in 1988, a Turing pattern of a  
 23 reaction-diffusion (RD) system (Turing, 1952) is utilized to implement an arbitral periodicity,  
 24 although the pattern is thought to be biologically induced by a polar auxin transport (PAT).  
 25 The utilized condition have a critical wavelength at a selected parameter set, and the  
 26 wavelength is stable against growth. The partial differential equations used in the simulation  
 27 have linear type reaction terms with limits (Kondo and Asai, 1995).

$$\begin{cases} \partial u/\partial t = D_u \Delta^2 u + G(u, v) - cu \\ \partial v/\partial t = D_v \Delta^2 v + H(u) - fv \end{cases} \quad (2)$$

$$G(u, v) = \begin{cases} 0 & (G < 0) \\ au - bv & (0 \leq G < G_{max}) \\ G_{max} & (G \geq G_{max}) \end{cases} \quad (3)$$

$$H(u) = \begin{cases} 0 & (H < 0) \\ eu - k_v & (0 \leq H < H_{max}) \\ H_{max} & (H \geq H_{max}) \end{cases} \quad (4)$$

29 The parameters used in the simulation are as follows;  $dt = 0.2$ ,  $ds = 1$ ,  $D_u = 0.015$ ,  
 30  $D_v = 0.45$ ,  $a = 0.04$ ,  $b = 0.04$ ,  $c = 0.012$ ,  $e = 0.07$ ,  $f = 0.05$ ,  $k_v = 0.025$ ,  $G_{max} =$   
 31  $0.01$ , and  $H_{max} = 0.05$ . The periodical positional information by RD is expressed by  
 32 different concentrations of component  $u$  on respective connected segments  $i$ th  $j$ th, i.e.,  $u_i$ ,  
 33  $u_j, \dots$  etc. Then the pattern is affected by the gradient  $w_y$  that work on the diffusivity  $D_u$  as  
 34  $D_u/(0.1 + 0.9w_y)$ . Therefore, the wavelength become long and finally pattern disappear for

1 the deficient of  $w_y$ . This would strongly change the local outgrowths of the contour. The  
2 parameter-set yields a stable splitting with domain extensions as similar shown in (Nakamasu  
3 *et al.* 2014).

4 For a leaf-like shape, a combination of above two growth algorithms is utilized. As  
5 mentioned in (Bilborough *et al.* 2014), the propagation is periodically changed on the  
6 boundary, in the model for leaf serration of *A. Thaliana*. In this research, the boundary  
7 propagation of additive growth is periodically inhibited by the periodic pattern. A gradient,  
8 that composed in the leaf model by (Bilborough *et al.* 2014) inhibited a periodical growth on  
9 the margin, although, the gradient activates the periodical pattern formation in this research  
10 (i.e., activation of the biased restriction of additive growth with periodicity), and the gradient  
11 also inhibits the expansive growth. The speeds set as  $VA_{ij} = \alpha(1 - (u_i + u_j)/2)$  for  
12 periodical additive-growth, then  $VE_{ij}$  is same as the form mentioned above for the  
13 expansive growth. Resulted shapes are obtained in every 10000 iterations then superimposed  
14 aligning the bottoms in Fig. 4A, B.

## 15 **Results**

17 Plant morphogenesis is known to lack drastic cell movements. Therefore, in cell  
18 based growth the existence of cell proliferation greatly affect the shaping processes.  
19 Boundary growth keeps the polygon with straight line by expansion, though cell proliferation  
20 can absorb the straightness with local deformation. The difference in the involvement of cell  
21 proliferation was implemented in a boundary of a growing form by simple algorithms as  
22 different growth modes (Fig. 1A, Fig. 3A). The algorithms are named as additive growth and  
23 expansive growth, respectively. The shapes that can be generated by these algorithms were  
24 explored, as follow.

### 25 **Relative shapes were obtained against uniaxial positional information with different 26 lengths in the additive growth algorithm**

27 In the algorithm for additive growth, a contour was expressed by the closed polygon  
28 composed of a set of points and segments, what connect two adjacent points. Each point  
29 propagated over time to the centrifugal side along its normal vector (Fig. 1A). When the  
30 length of a segment exceeded a threshold by the propagation, the segment was divided. If an  
31 initial condition was given as a regular-polygon arrangement composed of 10 nodes, the  
32 shape grew with a constant  $\alpha$  as the propagation speed. The propagated boundaries keeping  
33 smooth curves were superimposed in Fig. 1B as a time-series.

34 Next, a uniaxial linear-gradient with a length  $\beta$  was added as stable positional  
35 information to this system (Fig. 1C). Subsequently, a symmetrical growth from a regular  
36 polygon (includes 20 nodes) was biased (Fig. 1D). If the gradient (starting from the base) had  
37 a function to suppress the growth, the shape grew laterally. It was caused by a continuous  
38 suppression of the local growth within the  $\beta$  height. As a result, it became an oval shape  
39 with a long horizontal-axis. Three trials of calculation against a geometric sequence of  
40  $\beta_n = \beta r^{n-1}$  ( $\beta = 10, r = 2, n \leq 3$ ) were shown in Fig. 1D. The calculations were continued  
41 until the number of segments over 200, in these trials. The time-series with their respective  
42  $n$ 's seemed to include similar shapes. A contour with a different size was observed in an  
43 earlier time of another time-series with a smaller  $n$  (i.e., these time-series till a certain time  
44 seemed to be nested). When the calculation of each trial was extended until the number of  
45 segments had reached the values of  $r^{n-1}$  of 200 for respective  $n$ s, the boundaries had an

1 asymptotically equivalent shape (Fig. 1F).

2 When horizontal to vertical (H/V) ratios were obtained as an allometric index of these  
3 shapes, the H/V ratios increased with an increase in the number of line segments (Fig. 1E,  
4 Fig. 1G). Then, the overlap of the plots could be confirmed when the lengths were  
5 standardized with  $\beta$  (Fig. 1H). Therefore, obtained shapes were relative to the  $\beta$ s; each  
6 length of gradient.

7 In the case of a periodical growth on the boundary (Fig. 1I), the relative shaping can  
8 also be obtained (Fig. 1J). A characteristic rule mentioned in (Nakamasu *et al.*, 2014;  
9 Nakamasu *et al.*, 2017, Nakamasu and Higaki, 2019) was followed in the branch  
10 arrangements caused by positional information with different wave lengths of periodicity.

11 Therefore, this additive growth algorithm seemed to give similar shapes in the  
12 morphogenesis. That is, relative shaping could be observed as the percentage of  $\beta$  that was  
13 determined by  $w_y$ -related positional information.

14

### 15 **A shaping robustness was observed against different shapes of initial condition in the** 16 **additive growth algorithm**

17 Although the shape was updated at each step, relative shapes could be obtained to the  
18 length of gradients for the uniaxial restriction of additive growths. These growing shapes  
19 were regarded as robust against difference in sizes of initial conditions, and time- and  
20 spatial-intervals for calculations, i.e., the propagation speed  $\alpha$  and the segment threshold  $th$   
21 with  $\beta$ -scalings, in a certain range.

22 Considering about initial conditions, symmetrical growths from a regular polygon  
23 with 20 nodes weren't hardly disturbed within the early calculation steps. Because the effects  
24 of the gradient were small enough on a small shape when it was compared with the gradient.  
25 Even in the cases of the polygon shape as an initial condition was changed to wider or taller  
26 polygonal ring, shaping robustness was also observed (Fig. 2A-C). However, obtained shapes  
27 were slightly affected by the initial conditions (Fig. 2D). A 20-nodes polygon with a 2:1 H/V  
28 ratio resulted in a longer horizontal axis than the others, and a polygon with a 1:2 H/V ratio  
29 resulted in a shape with a longer vertical axis than the others. When the simulation was  
30 started from a square or an up- or a down-ward-pointed triangles, the obtained shape also  
31 affected by the initial condition (Fig. 2E-G). Though, they approached the asymptotically  
32 equivalent shape that starting from a regular polygon (Fig. 2A). That is, the robustness during  
33 shaping processes could be obtained against different shapes of initial conditions.

34 A comparison of plots of aspect ratios in these shapes showed a greater overlap  
35 between the down-ward-pointed-triangle case and the square case (Fig. 2H). It was obvious  
36 that the lower side (with less propagation by a biased restriction) was more robust to the  
37 change in shapes.

38 Therefore, it was found that a uniaxial gradient was sufficient to regulate a  
39 two-dimensional shape. It was then considered that the restrictions of growth speed were  
40 effective for the shaping robustness.

41

### 42 **A shaping variation was obtained by a difference in lengths of inhibitory gradients in** 43 **this expansive growth algorithm**

44 In the case of expansive growth, connection points in a closed polygon were  
45 propagated along the vectors from the geometric center of the initial condition. As a result,  
46 divided triangles in the polygon that share each apex at the geometrical center were  
47 magnified then the growth kept shape similarity. A set of 10 segments arranged as a regular

1 polygon for the initial condition, the shape was simply magnified, although the edges  
2 composed of some line segments because, initial segments were divided in several times into  
3 two segments when it exceeded a threshold. They sustained straightness (Fig. 3B), while  
4 additive growth bend it. Even though each propagation proceeded at a constant rate  $\gamma$ , the  
5 magnification process was accelerated by extending vectors referenced. To remove the  
6 acceleration, the vectors were normalized by the representative; i.e., tallest, vector.

7 The time-series of growing shapes by the expansive growth with inhibitory gradients  
8 were shown in Fig. 3D. A uniaxial linear-gradient with a length  $\beta$  was added as positional  
9 information to this system. Three trials of calculation for each  $\beta$  in geometric sequence of  
10  $\beta_n$  were done. Each initial polygon (composed of 20 nodes) seemed to grow taller with the  
11 biased growth. Because the differences between the lengths of adjacent vectors were  
12 emphasized during the growing shape within the gradient.

13 When the aspect ratio was plotted against the number of segments in a contour, the  
14 time series was decreased from a value of 1 for extension along the vertical axis. The  
15 declining plot showed a similar transition rate within each gradient (Fig. 3E). Subsequently,  
16 when the growing shapes escape the gradient, they started to expand maintaining the  
17 proportion at that point. Therefore, boundaries with a similar shape were commonly observed  
18 among these time-series with the respective  $n$ 's. A shape with a different size observed at an  
19 earlier time of the time series with a larger  $n$  (i.e., the time series seemed to be nested in  
20 reverse order of the case of additive growth).

21 Therefore, in this expansive algorithm, it was found that the difference in the lengths  
22 of inhibitory gradient will be converted to a diversity in shaping.

### 23 24 **The shaping variation caused by the expansive growth algorithm was not cancelled even** 25 **in combinations of additive growths**

26 When the expansive growth was combined with additive growth with or without bias  
27 (Fig. 3C), the time-series of shapes obtained by different  $\beta_n$ , showed no longer similar (Fig.  
28 3F-I). The shape variation, i.e., oblong diversity caused by the expansive growth algorithm,  
29 were not cancelled even with the negate effects by the additive growths. Therefore, the  
30 changing shape did not show a shaping robustness corresponding to the length of the gradient.  
31 In the H/V ratios plotted against the number of line segments within a contour, the ratios first  
32 decreased with overlap then increased at respective timings, as shown in Fig. 3G, I. A larger  
33  $n$  thus has a longer vertical axis within these ranges.

34 In the case of leaf shape formation, such a combination of growth modes seems to be  
35 operative. Mixtures of cell sizes observed in marginal serrations in *A. thaliana* leaves  
36 (Kawamura *et al.*, 2010) indicate the existence of cell expansions accompanied by cell  
37 proliferations i.e., a combined growth modes mentioned above. As shown in (Bilthborough *et*  
38 *al.*, 2011), periodical growth at the margin and the bias of the growth rate were incorporated  
39 together for description of leaf development. Difference in the biased positional information  
40 is known to be important for a particular shaping in actual leaves. That is, the boundary of the  
41 graded basal growth zone can change the complexities of the leaf shape (Kierzkowski *et al.*,  
42 2019).

43 It was considered the cases even in entire leaves. When the gradient lengths were  
44 fixed within about double wavelengths (i.e.,  $\beta \lesssim 2\lambda$ ) of the periodic pattern, entire leaf-like  
45 shapes with smooth margin could be obtained autonomously.  $\lambda$  is the critical wavelength of  
46 a Turing pattern that caused by interactions between  $u$  and  $v$  (Miura and Maini, 2004),  
47 then it was derived as  $\sim 8.8$  in this parameter set. In Fig. 4A, B, both leaf shapes were simple

1 within the entire margins, although, these leaves indicated different proportions by different  
2  $\beta$ s. The longer bias resulted in a narrower proportion, as expected from the above result of  
3 combination in Fig. 3F, H. The change in the aspect ratios (Fig. 4C, D) were also follow the  
4 result of combined case in Fig. 3G, I. These effects of additive growth were not linear in this  
5 case (as shown in the graphs in Fig. 4A, B), though, a difference in the proportions was  
6 obtained certainly by the expansive growth that encouraged by inhibitory gradients with  
7 different lengths.

8 It was confirmed that when the expansive growth read out inhibitory gradients, it  
9 became a generator of diversity in terms of shape, as well as in the case of the combination of  
10 the algorithms. Leaf-like shapes with different proportions were regenerated by different  
11 lengths of the gradient in simulations of combined growth modes.

## 12 13 **Discussion**

14 In this research, different algorithms, based on different growth modes, and their  
15 combinations were examined to considering the morphogenetic problems related to response  
16 to positional information. These growth modes, cell expansion with or without cell  
17 proliferation, were implemented with simple algorithms, additive and expansive, respectively.  
18 During these trials, uniaxial gradients with different lengths were given as the positional  
19 information for biased restrictions of additive (Fig. 1) and/or expansive (Fig. 3) growths.

20 In the additive growths, relative shapes correspond to the length of the gradient was  
21 observed (Fig. 1D-J, Fig. 2). The relative shaping was maintained against spatial- and  
22 temporal- difference in intervals of the calculations (Fig. 1F-H). Then the shaping similarity  
23 could also be obtained against different lengths of periodicity on the margins (Fig. 1I,J). It  
24 may seem geometrically self-evident, though the robustness of growing shapes from different  
25 sizes and shapes of initial conditions (Fig. 2) indicates a two-dimensional effect on shaping  
26 by positional information of uniaxial gradient. The obtained shape resembled a bacterial  
27 colony grown on inhomogeneous environment (Tasaki *et al.*, 2017), that seems to be brought  
28 by the proliferations of linked cells on the edge. Such regularities to positional information  
29 may follow the morphogenetic robustness in development and regeneration as described in  
30 (Thompson, 1917; Niklas, 1994; Fujiwara *et al.*, 2021), and so on.

31 It is known that activated area in a reaction-diffusion pattern is approximately  
32 proportional to total size even though it can be affected by boundary condition as discussed in  
33 (Gierer and Meinhardt, 1972) and reviewed in (Chapek and Müller, 2019). Therefore, actual  
34 positional information usually sets into the intended domain as an effect of scaling. Though,  
35 the positional information in this study was a uniaxial gradient that ignore the size of the  
36 object, the characteristic shape of additive growth became obvious when the boundaries grow  
37 over the lengths of the gradients. In Fig. S1, we show a case of shift of the positional  
38 information from without ( $w_y = 0$ ) inhibition when the shape within length  $\beta$  to a gradient  
39 when it over the length. This trial did not affect the results obtained. Such positional  
40 information is exist especially in leaf developments (Kazama *et al.*, 2010, Tsukaya, 2013,  
41 Nakayama *et al.*, 2014). That is, in actual leaf, it seemed that cell proliferation dosen't biased  
42 in their early stage of formation within a boundary of cell cycle arrest front (AF).

43 However, the same gradient became a generator of various shapes in the case of  
44 expansive growth implemented as an algorithm (Fig. 3D, E). Differences in initial conditions  
45 or in propagation speeds will also change the shapes obtained. Even in a combination with  
46 the additive growth, the expansive growth kept the capacity to generate shape variation,  
47 accompanied by a loss of the regulation to the gradient (Fig. 3F-I). Therefore, the additive



1 always governed by the gradient, though, the expansive which can escape it. However, these  
2 shapes still maintain robustness if the set of parameters is fixed. A same shape can be  
3 obtained repeatedly by an appropriate adjustment of the set of parameters.

4 Entire leaves with different proportions were reproduced by the combination of both  
5 modes with a difference in lengths of graded positional information (Fig. 4). The molecular  
6 mechanism for such difference was suggested in (Kierzkowski *et al.*, 2019), then we treated  
7 “growth” of different modes expressed by simple algorithms. The different modes are  
8 considered caused by difference in progressions of tissue differentiation, in where the  
9 corresponding cells were located. In this case the positional information will be read-out to  
10 the boundary between cell proliferative phase and cell expansions after determination, known  
11 as AF on leaves in *A. thaliana* (Donnelly *et al.*, 1999; Kazama, *et al.*, 2010). Several  
12 molecules on the leaf blade are known to be related to the boundary determination of the  
13 plate meristem (Tsukaya, 2021). There are several examples that shows perturbations of such  
14 positional information change leaf proportions (Horiguchi *et al.*, 2005; Kawade *et al.*, 2010).  
15 Then differences in size and shape among other simple leaves are known to be derived from  
16 allometric growth patterns along with proximo-distal axis (Gupta & Nath, 2015). It was  
17 considered that the difference in proportions might be caused by the axially biased  
18 expansions at the different ranges, though, the combination of the boundary growths was not  
19 simple, i.e., a combination of a biased periodicity and graded uniaxial expansions.

20 As a biological relevance of this model, the hebetate protrusions that obtained by  
21 local growth in the additive growth algorithm (Nakamasu *et al.*, 2014) can be observed in  
22 actual leaflets (Gleissberg, 2004, Ikeuchi *et al.*, 2013) and in younger tooth in *A. thaliana*  
23 (Kawamura *et al.*, 2010). *Papaveraceae* primordia with a certain difference in cell sizes  
24 shows such shapes in leaflets in early organogenesis stage (Gleissberg *et al.*, 2004). Thought,  
25 it might not be derived from the difference in the tissue maturation states as mentioned in  
26 (Ikeuchi *et al.*, 2013). Therefore, almost similar sizes of cells on the tips of the primordia  
27 might be caused by repeated cell proliferations that were described by the additive growth  
28 algorithm. Furthermore, the combined growth modes confirmed as mixed cell sizes is known  
29 to result in pointed protrusions observed in leaf serration in *A. thaliana* (Kawamura *et al.*,  
30 2010). Similar pointed shapes can be observed in unicellular algae, then it was treated with  
31 decrease in spacing in a developmental model (Laccalli and Harrison, 1987; Holloway and  
32 Harrison, 1999). However, the cases with bias had not been investigated. D’Arcy Thompson  
33 dealt with leaf shape in chapter IX of his book “On Growth and Form” (Thompson, 1917). In  
34 this chapter, he said that the balance between radial and tangential growth velocities is  
35 important for the leaf shapes exemplified in the Fig. 127. The present algorithm for biased  
36 expansion seems to affect this balance.

37 It was expected that the expansive growth in this study included distortions caused by  
38 the bias as shown in Fig. 8. Magnification of a triangle gives equal extensions of the three  
39 sides; however, it is obvious that magnified triangles with different expansion rates cannot  
40 connect their adjacent apical edges, even though they share basal apices at the geometric  
41 center. In closed contour, these apical edges need to be connected. As shown in Fig. 5A,  
42 polygons with different growth rates in its sides always have slants. i.e., an isosceles shown  
43 as meshed triangle in Fig.5A has slant. It can observe in serrations but it is uncertain whether  
44 it occur in formation of entire leaves. Though the whole shape in schematics of simulations  
45 (Fig.5A) has sharper distal and blunter proximal as frequently sown in leaf shapes. When we  
46 pick up arbitral one of divided triangles in a polygon (Fig. 5B), the apical edge propagates  
47 with some slants. The degree of slants will different with degree of the center angles,

1 propagation speeds, and position of the triangle, dependently. As a results, generated  
2 differences in edge lengths and interior angles lead to slants in the shape. These problems yet  
3 have less biological relevance so they need to be addressed in more detail.

#### 4 **Conclusion**

5 Different algorithms for two types of growth modes brought different responses against  
6 simple positional information, i.e., that always governed by it or that can escape it. It was  
7 predicted theoretically that an expansive growth has a capacity to become a generator of  
8 oblong diversity in leaf morphogenesis. The effect was confirmed even in the combination  
9 case of additive growth with negate effects.

#### 10 **Conflict of interest**

11 The authors declare that the research was conducted in the absence of any commercial or  
12 financial relationships that could be construed as a potential conflict of interest.

#### 13 **Auther contribution**

14 The author confirms being the sole contributor of this work and has approved it for  
15 publication.

#### 16 **Funding**

17 This research was supported by Grant-in-Aid for Scientific Research on Innovative Areas  
18 (Japan Society for the Promotion of Science), Periodicity, and its modulation in plants.  
19 No.20H05421.

#### 20 **Acknowledgements**

21 Author thanks Dr. T. Higaki, members of his laboratory, and IROAST staffs for the research  
22 environment provided. Thanks also to Dr. S. Kimura and Dr. N. J. Suematsu for the repeated  
23 discussions on leaf-shape morphogenesis, and Dr. A. Mochizuki for comments on initial  
24 conditions. Then I'd like to thank to anonymous reviewer(s) for kind reviews of my  
25 manuscript. Then I'd like to thank this beautiful nature with abundant diversity.

#### 26 **References**

- 27 1. **Bilsborough, G.D., Runions, A., Barkoulas, M., Jenkins, H.W., Hasson, A., Galinha, C., Laufs, P., Hay, A., Prusinkiewicz, P., and Tsiantis, M.** (2011). Model for the regulation of Arabidopsis thaliana leaf margin development, *Proc. Natl. Acad. Sci. U S A* **108**, 3424-3429.
- 28 2. **Capek, D., and Müller, P.** (2019). Positional information and tissue scaling during development and regeneration. *Development* **146**: dev177709.
- 29 3. **Cooke, J.** (1981). Scale of body pattern adjusts to available cell number in amphibian embryos. *Nature* **290**, 775-778.
- 30 4. **Donnelly, P. M., Bonetta, D., Tsukaya, H., Dengler, R. E., and Dengler, N. G.** (1999). Cell cycling and cell enlargement in developing leaves of Arabidopsis. *Dev. Biol.* **215**, 407-419.
- 31 5. **Driesch, H.** (1892). The potency of the first two cleavage cells in echinoderm development. Experimental production of partial and double formations, in; Hafner (Eds), Foundation of experimental biology, New York, NY USA.

- 1 6. **Fujiwara, M., Gho, T., Tsugawa, S., Nakajima, K., Fukaki, H., and Fujimoto, K.**  
2 (2021). Tissue growth constrains root organ outlines into an isometrically scalable shape.  
3 *Development* **148**, dev196253.
- 4 7. **Gierer, A., and Meinhardt, H.** (1972). A theory of biological pattern formation.  
5 *Kybernetik* **12**, 30-39.
- 6 8. **Gleissberg, S.** (2004). Comparative analysis of leaf shape development in *Eschscholzia*  
7 *Californica* and other Papaveraceae-Papaveroidea. *Am. J. Bot.* **91**(3), 306-312.
- 8 9. **Gupta, M.D., and Nath, U.** (2015). Divergence in patterns of leaf growth polarity is  
9 associated with the expression divergence of miR396. *The Plant Cell* **27**, 2785-2799.
- 10 10. **Harrison, L. G., and Kolar, M.** (1988). Coupling between reaction-diffusion prepattern  
11 and expressed morphogenesis, applied to desmids and dasyclads, *J. Theo. Biol.* **130**,  
12 493–515.
- 13 11. **Hervieux, N., Dumond, M., Sapala, A., Routier-Kierzkowska, A-L., Kierzkowski, D.**  
14 **Roeder. A. H. K., Smith, R. S., Boudaoud, A., and Hamant, O.** (2016). A Mechanical  
15 feedback restricts sepal growth and shape in *Arabidopsis*. *Current Biology* **26**,  
16 1019-1028.
- 17 12. **Holloway, D. M., and Harrison, L. G.** (1999). Algal morphogenesis: modelling  
18 interspecific variation in *Micrasterias* with reaction-diffusion patterned catalysis of cell  
19 surface growth. *Phil. Trans. R. Soc. London. Ser. B.* **354** (1382), 417-433.
- 20 13. **Horiguchi, G., Kim, G.-H., and Tsukaya, H.** (2005). The transcription factor AtGRF5  
21 and the transcription coactivator AN3 regulate cell proliferation in leaf primordia of  
22 *Arabidopsis thaliana*. *Plant J.* **43**, 68-78.
- 23 14. **Ikeuchi, M., Tatematsu, K., Yamaguchi, T., Okada, K., and Tsukaya, H.** (2013).  
24 Precocious Progressions of tissue maturation instructs basipetal initiation of leaflets in  
25 *Chelidonium Majus* Subsp. *Asiaticum* (Papaveraceae). *Am. J. Bot.* **100** (60), 1116-1126.
- 26 15. **Kawade, K., Horiguchi, G., and Tsukaya, H.** (2010). Non-cell-autonomously  
27 coordinated organ size regulation in leaf development. *Development* **137**. 4221-4227.
- 28 16. **Kawamura, E., Horiguchi, G., and Tsukaya, H.** (2010). Mhanisms of leaf tooth  
29 formation in *Arabidopsis*, *Plant J.* **62**, 429–441.
- 30 17. **Kazama, T., Ichihashi, Y., Murata, S., and Tsukaya, H.** (2010). The mechanism of cell  
31 cycle arrest front progression explained by a KLUH/CYP78A5-dependent mobile growth  
32 factore in developing leaves of *Arabidopsis thaliana*. *Plant Cell Physiol.*  
33 **51**(6),1046-1054.
- 34 18. **Kierzkowski, D., Runions, A., Vuolo, F., Strauss, S., Lymbouridou, R.,**  
35 **Routier-Kierzkowska, A-L., Wilson-Sanchez, D., Jenke, H., Galinha, C., Mosca, G.,**  
36 **et al.** (2019). Growth-Based Framework for Leaf Shape Development and Diversity. *Cell*  
37 **177**, 1405-1418.
- 38 19. **Kondo, S., and Asai, R.** (1995). A reaction-diffusion wave on the skin of the marine  
39 angelfish *Pomacanthus*. *Nature* **376**, 765–768.
- 40 20. **Kuchen, E. E., Fox, S., de Reuille, P. B., Kennaway, R., Bensmihen, S., Avondo, J.,**  
41 **Calder, G. M., Southam, P., Robinson, S., Bangham, A., and Coen, E.** (2012).  
42 Generation of leaf shape throught early patterns of growth and tissue polarity. *Science*  
43 **335**, 1092-1096.
- 44 21. **Laccalli, T. C., and Harrison, L. G.** (1987). Turing's model and branching tip growth:  
45 relation of time and spatial scales in morphogenesis, with application to *Micrasterias*,  
46 *Can. J. Bot.* **65** (7), 1308-1319.

- 1 22. **Meinhardt, H.** (1982). *Models of biological pattern formation*, London, Academic
- 2 Press.
- 3 23. **Miura, T., and Maini, P.** (2004). Speed of pattern appearance in reaction-diffusion
- 4 models: Implications in the pattern formation of limb bud mesenchyme cells. *Bull. Mathe.*
- 5 *Biol.* **66**, 27-649.
- 6 24. **Morishita, Y., Kuroiwa, A., and Suzuki, T.** (2014). Quantitative analysis of tissue
- 7 deformation dynamics reveals three characteristic growth modes and globally aligned
- 8 anisotropic tissue deformation during chick limb development. *Development* **142**,
- 9 1672-1683.
- 10 25. **Murray, J. D.** (2001). *Mathematical Biology II: Spatial Models and Biomedical*
- 11 *Applications*, New York, Springer.
- 12 26. **Nakamasu, A., and Higaki, T.** (2019). Theoretical models for branch formation in
- 13 plants. *J. Plant Res.* **132** (3), 325-333.
- 14 27. **Nakamasu, A., Nakayama, H., Nakayama, N., Suematsu, J. N., and Seisuke, K.**
- 15 (2014). A developmental model for branching morphogenesis of lake cress compound
- 16 leaf, *PLoS ONE* **9** (11): e111615.
- 17 28. **Nakamasu, A., Suematsu, J. N., and Seisuke, K.** (2017). Asymmetry in leaf branch are
- 18 associated with differential speed along growth axes: A theoretical prediction. *Dev. Syn.*
- 19 **246**, 981-991. 10.1002/DVDY.24587.
- 20 29. **Nakayama, H., Nakayama, N., Seiki, S., Kojima M., Sakakibara, H.,**
- 21 **Sinha, N. Kimura S.** (2014) Regulation of the KNOX-GA gene module
- 22 induces heterophyllic alteration in North American lake cress. *The Plant*
- 23 *Cell* **26**(12), 4733-4748.
- 24 30. **Niklas, K. J.** (1994). *Plant Allometry, The Scaling of form and Process*, Chicago,
- 25 University of Chicago Press.
- 26 31. **Schmidt, N. K.** (1984). *Scaling, Why is Animal Size so Important?*, Cambridge; New
- 27 York: Cambridge University Press.
- 28 32. **Sethian, J.** (1999). *Level Set Methods and Fast Marching Methods: Evolving Interfaces*
- 29 *in Computational Geometry, Fluid Mechanics, Computer Vision, and Materials Science*,
- 30 Cambridge, UK, Cambridge Univ Press.
- 31 33. **Spemann, H.** (1938). *Embryonic Development and Induction*, New Haven, Yale
- 32 University press.
- 33 34. **Summerbell, D., Lewis, H. J., and Wolpert, L.** (1973). Positional Information in Chick
- 34 Limb Morphogenesis. *Nature* **244**, 492-496.
- 35 35. **Tasaki, S., Nakayama, M. and Shoji, W.** (2017). Self-organization of bacterial
- 36 communities against environmental pH variation: Controlled chemotactic motility
- 37 arranges cell population structures in biofilms. *PLoS ONE* **2**(3), e0173195.
- 38 36. **Thompson, D. A. W.** (1917). *On Growth and Form*, Cambridge University Press.
- 39 37. **Tsukaya, H.** (2000). Heteroblasty in *Arabidopsis thaliana* (L.) Heynh. *Planta* **210**,
- 40 536-542.
- 41 38. **Tsukaya, H.**, (2013) Leaf development. In *The Arabidopsis Book*.(ed. American Society
- 42 of Plant Biologists) 11, e0163.
- 43 39. **Tsukaya, H.** (2021). The leaf meristem enigma: The relationship between the plate
- 44 meristem and the marginal meristem. *The Plant Cell* **33**, 3196-3206.
- 45 40. **Turing, A. M.** (1952). Chemical basis of morphogenesis. *Phil Trans R Soc London Ser*
- 46 *B* **237**, 37-72.
- 47 41. **Wolpert, L.** (1969). Positional information and the spatial pattern of cellular

1 differentiation. *J. Theor. Biol.* **25**, 1-47. doi:10.1016/S0022-5193(69)80016-0.  
 2 42. Zhang, Z., Runions, A., Mentink, R.A., Kierzkowski, D., Karady, M., Hashemi, B.,  
 3 Huijse, P., Strauss, S., Gan, X., Ljung, K., Tsiantis, M. (2020). A WOX/ Auxin  
 4 biosynthesis module controls growth to shape leaf form. *Current Biol.* **30**, 4857-4868.

5  
 6 **Data availability statement**

7 The raw data supporting the conclusion of this article will be made available by the authors,  
 8 without undue reservation.

9  
 10 **Table**

11 **Table 1. Parameters utilized in the biased restriction of growth.**

|            | $VA_{ij}$                       | $\beta$      | $VE_{ij}$             | Initial condition                     |
|------------|---------------------------------|--------------|-----------------------|---------------------------------------|
| Fig. 1B    | 0.002                           | -            | 0                     | 10-nodes reg. <sup>1</sup><br>polygon |
| Fig. 1D-H  | 0.002<br>(1- $w_y$ )            | 10, 20, 40   | 0                     | 20-nodes reg.<br>polygon              |
| Fig. 1I, J | 0.002<br>(1-( $u_i + u_j$ )/2)  | -            | 0                     | 10-nodes reg.<br>polygon              |
| Fig. 2A    | 0.002<br>(1- $w_y$ )            | 10           | 0                     | 20-nodes reg.<br>polygon              |
| Fig. 2B    | 0.002<br>(1- $w_y$ )            | 10           | 0                     | 20-nodes hl. <sup>2</sup><br>polygon  |
| Fig. 2C    | 0.002<br>(1- $w_y$ )            | 10           | 0                     | 20-nodes vl. <sup>3</sup><br>polygon  |
| Fig. 2D    | 0.002<br>(1- $w_y$ )            | 10           | 0                     | 20-nodes<br>rectangle                 |
| Fig. 2E    | 0.002<br>(1- $w_y$ )            | 10           | 0                     | 12-nodes<br>d-p-triangle <sup>4</sup> |
| Fig. 2F    | 0.002<br>(1- $w_y$ )            | 10           | 0                     | 12-nodes<br>u-p-triangle <sup>5</sup> |
| Fig. 3B    | 0                               | -            | 0.002                 | 10-nodes reg.<br>polygon              |
| Fig. 3D,E  | 0                               | 10, 20, 40   | 0.002<br>(1- $w_y$ )  | 20-nodes reg.<br>polygon              |
| Fig. 3F,G  | 0.002<br>(1- $w_y$ )            | 10, 20, 40   | 0.002<br>(1- $w_y$ )  | 20-nodes reg.<br>polygon              |
| Fig. 3H,I  | 0.002                           | (10, 20, 40) | 0.002<br>(1- $w_y$ )  | 20-nodes reg.<br>polygon              |
| Fig. 4     | 0.0005<br>(1-( $u_i + u_j$ )/2) | 10, 20       | 0.0005<br>(1- $w_y$ ) | 20-nodes reg.<br>polygon              |

12 Notes:1. regular, 2. horizontal long, 3. vertical long, 4. down-pointed-triangle, 5  
 13 up-pointed-triangle.

14

1 **Figure legends**

2 **Fig. 1 An algorithm for expansive growth.**

3 (A) Schematics of propagation of a connection point. Deformation rules of a polygon in  
4 additive growth algorithm was shown. A connection point of two segments that composes a  
5 contour was moved along a unit normal vector of the apex (B) Superimposed time series of  
6 shapes obtained by the additive growth. (C) Schematics of the given gradient and its function  
7 on growth speed are illustrated. The concentration of the substance  $w_y$  linearly decreased  
8 along the vertical axis from the base of the shape. It functions as a biased restriction of  
9 growth. Then the size of initial condition was superimposed in it. (D) Superimposed time  
10 series of shapes obtained by a geometrical sequence of  $\beta = 10, 20, 40$  in the additive  
11 growths. Different lengths of the inhibitory gradients resulted in a nested similarity. (E) H/V  
12 ratios plotted against number of segments. (F-H) Shaping robustness corresponding to the  
13 lengths of inhibitory gradient with different length  $\beta = 10, 20,$  and  $40$ . (F) Superimposed  
14 time series till segments had reached the values of  $2^{n-1}$  of 200 segments for respective  
15  $n = 1, 2, 3$ . Horizontal/vertical ratios were plotted against (G) the number of segments in  
16 each contour and (H) standardized heights of the shapes.  
17 (I, J) Shaping robustness corresponding to the wave lengths of periodicity that inhibit the  
18 additive growths. (I) Schematics of prophylls of  $u$ -distribution and  $VA_{ij}$  on the peripheral.  
19 (J) Superimposed time series of boundaries obtained by an additive growth with periodical  
20 inhibition on the margin. The periodic patterns as each positional inhibition were generated  
21 by a reaction-diffusion system with different scale parameters (Murray, 2001).

22

23 **Fig. 2 A shaping robustness was observed against a shape difference in initial**  
24 **conditions.**

25 Examples of superimposed time series of shape boundaries from each trial of additive  
26 growths. Simulations were started from initial conditions with different shapes as (A) regular  
27 polygon, (B) wide- and (C) tall- polygons. (E) square, (F) up-ward-pointed triangle, and (G)  
28 down-ward-pointed triangle. (D), (H) Horizontal/vertical ratios plotted against the number of  
29 segments in each contour.

30

31 **Fig. 3 An algorithm for expansive growth and combination with additive growth.**

32 (A) Schematics of propagation of a connection point. Vector from the geometrical center of  
33 the initial condition in expansive growth algorithm. (C) Schematics of the biased expansive  
34 growth and their combinations. (D, F, H) Superimposed time series of shapes obtained by a  
35 geometrical sequence of  $\beta = 10, 20, 40$  in the expansive growths (D) and combinations  
36 with additive growths with biase (F) and without biase (H). (E, G, I) H/V ratios plotted  
37 against number of segments. (E) expansive growth, and combinations with biased (G) or  
38 unbiased (I) additive growths.

39

40

41 **Fig. 4 Leaf-like shapes with different proportions generated by inhibitory biases in**  
42 **combination of additive- and expansive- growths.**

43 Examples of superimposed time series of shape boundaries obtained by a simulation result of  
44 leaf like shape (A, B). (A) Shorter bias with  $\beta = 10$  and (B) longer bias with  $\beta = 20$ . The  
45 gradient lengths were set within a triple the length of marginal periodicity. In their  
46 right-hands, distributions of two kinds of speed ( $VA$  and  $VE$ ) in each last frame were shown  
47 in respective graphs. These distributions along the margin from the proximal to the distal of

1 each shape were plotted. Uppers are  $VA_{ij}$  for additive growth and lowers are  $VE_{ij}$  for  
2 expansive growth. Dashed lines indicate  $\alpha$  of  $VA_{ij}$  and  $\gamma$  of  $VE_{ij}$ , respectively. (C)  
3 The time-series plot of H/V ratios and (D) H/V ratios plotted to the number of segments in  
4 the contour.

5

6 **Fig. 5 Illustration of slants included in biased expansive growth.**

7 (A) Superimposed magnified triangles with graded growth rates and expected results of biased  
8 expansion in this study. Former are shown by solid lines, and the latter are indicated by  
9 dashed lines. An initial isosceles (meshed triangle) become slant with change in lengths of  
10 the sides. (B) One of the divided triangles in a polygon. The apical edge propagates with  
11 some slants in the gradient (gray shade). The change in the directions of edges (the points at a  
12 start and when the edge escaped the gradient) were shown by two axes with a curved arrow.

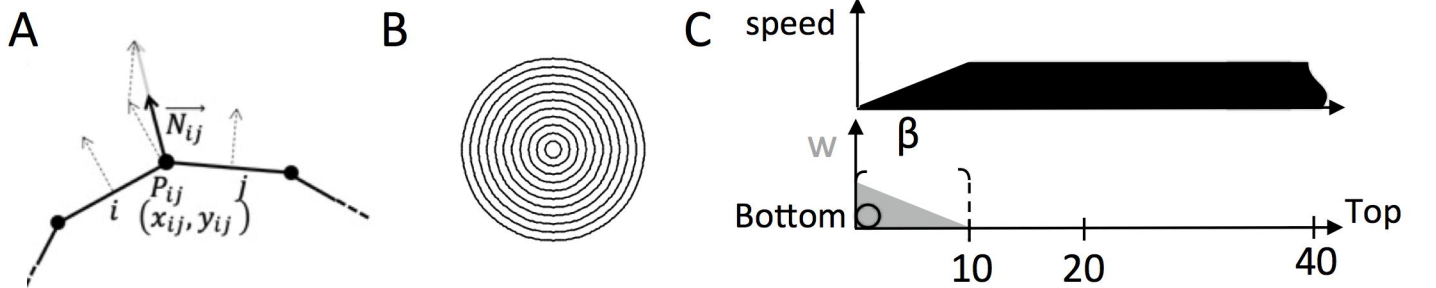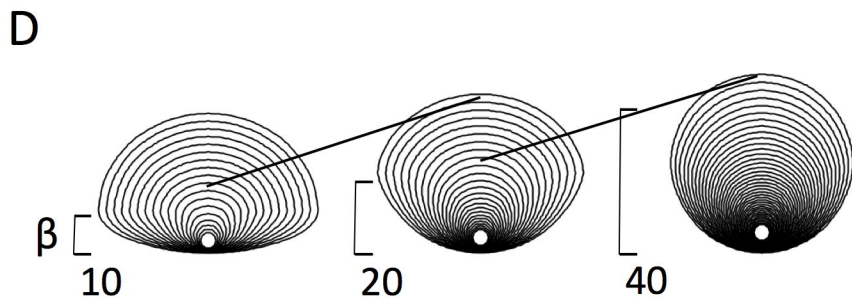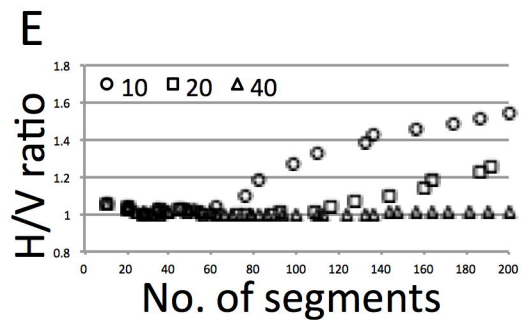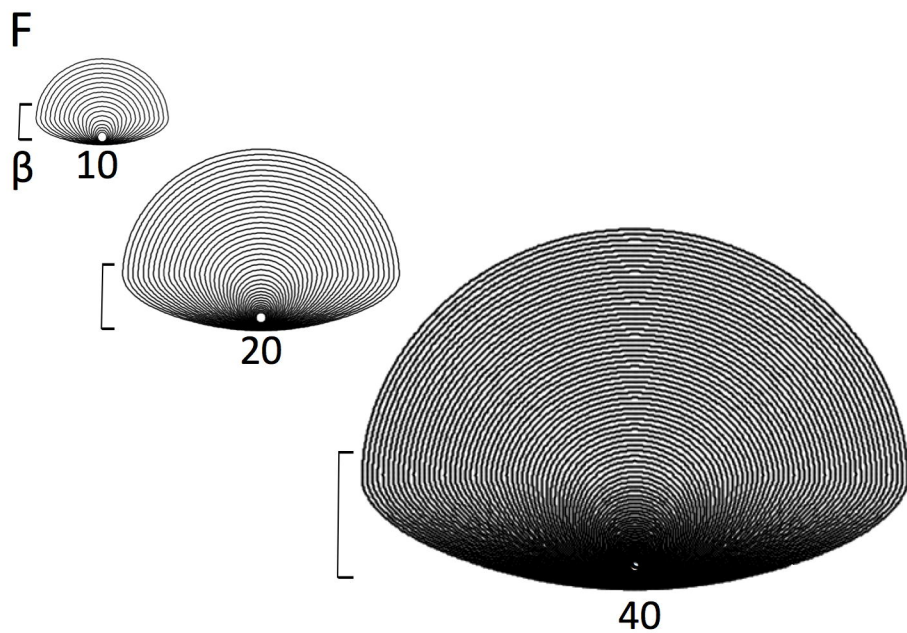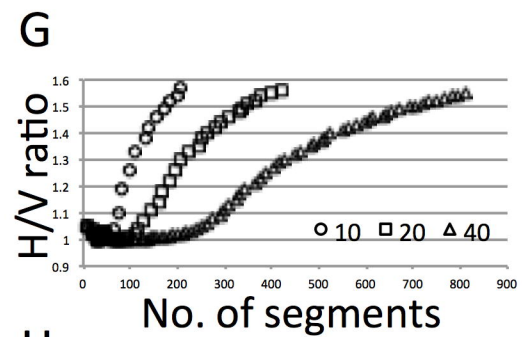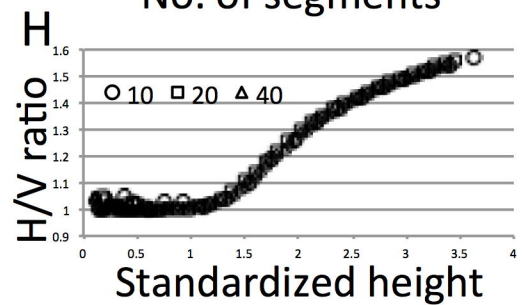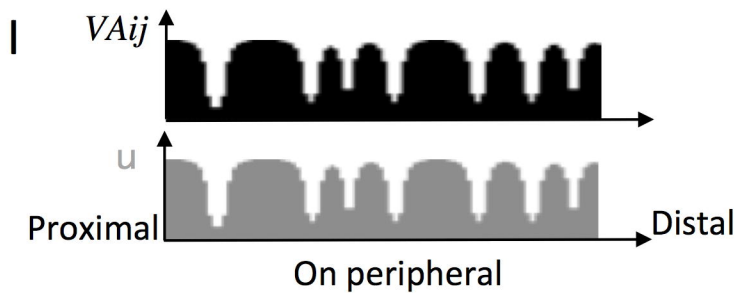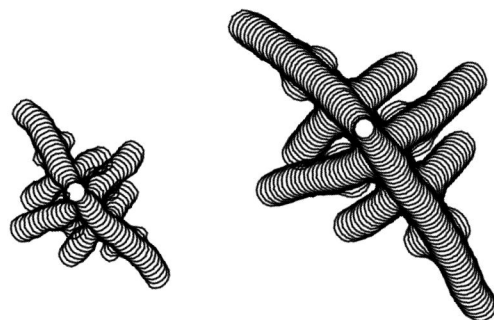



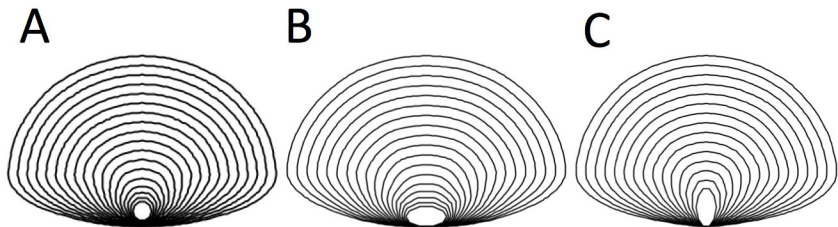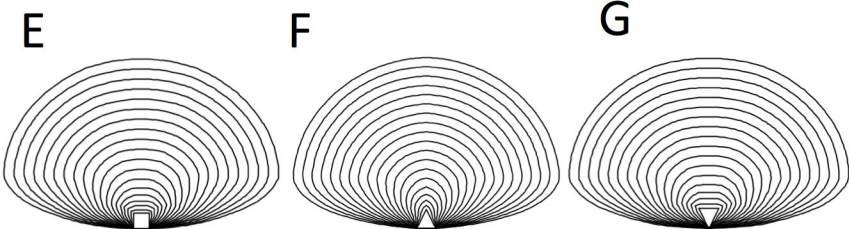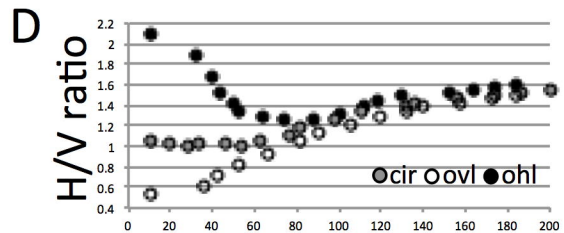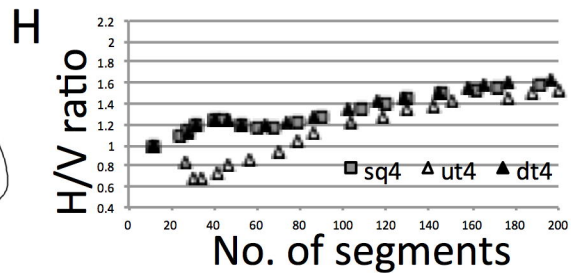

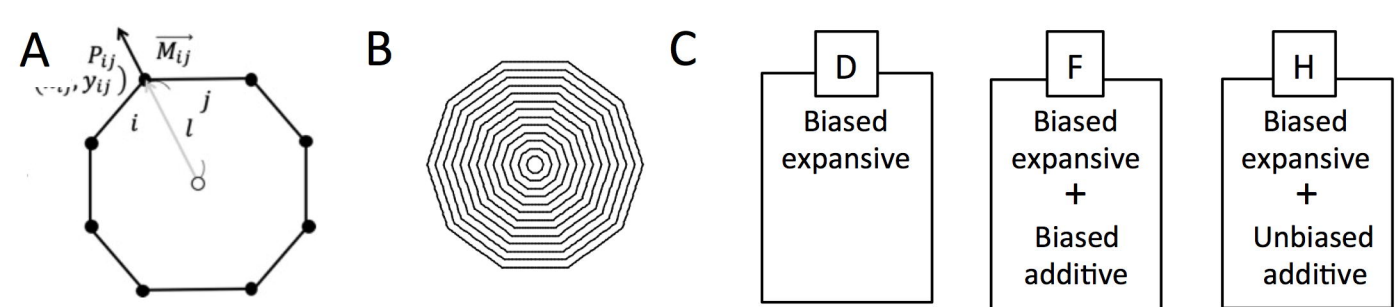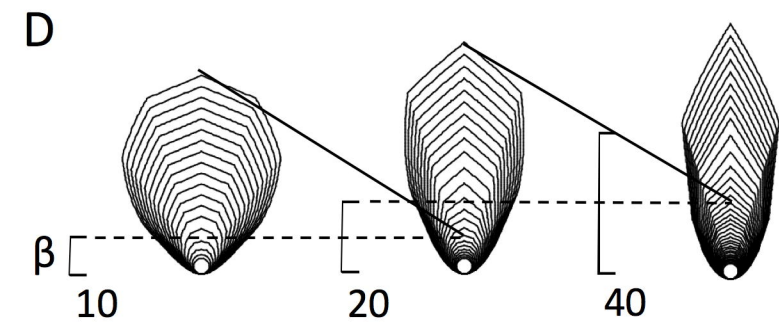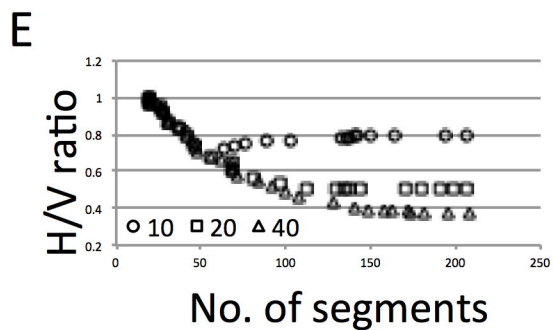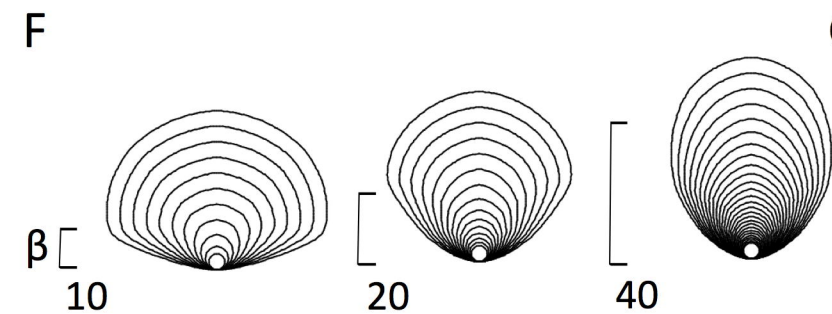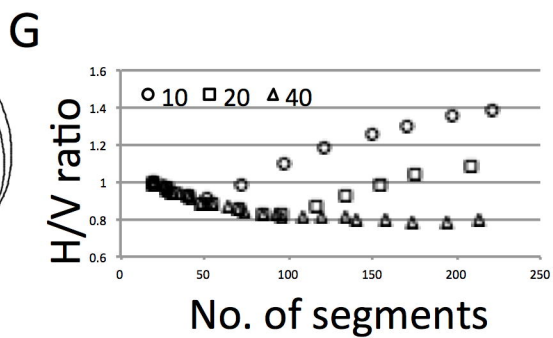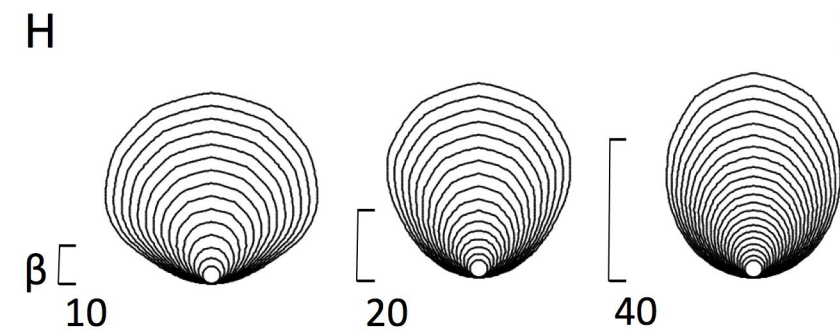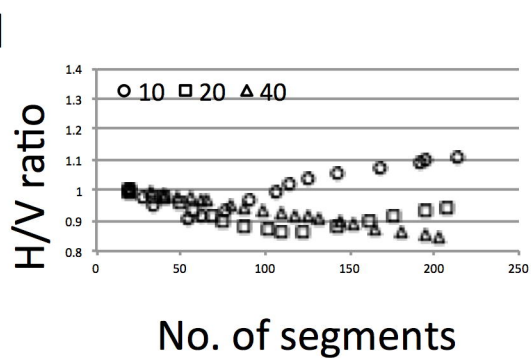

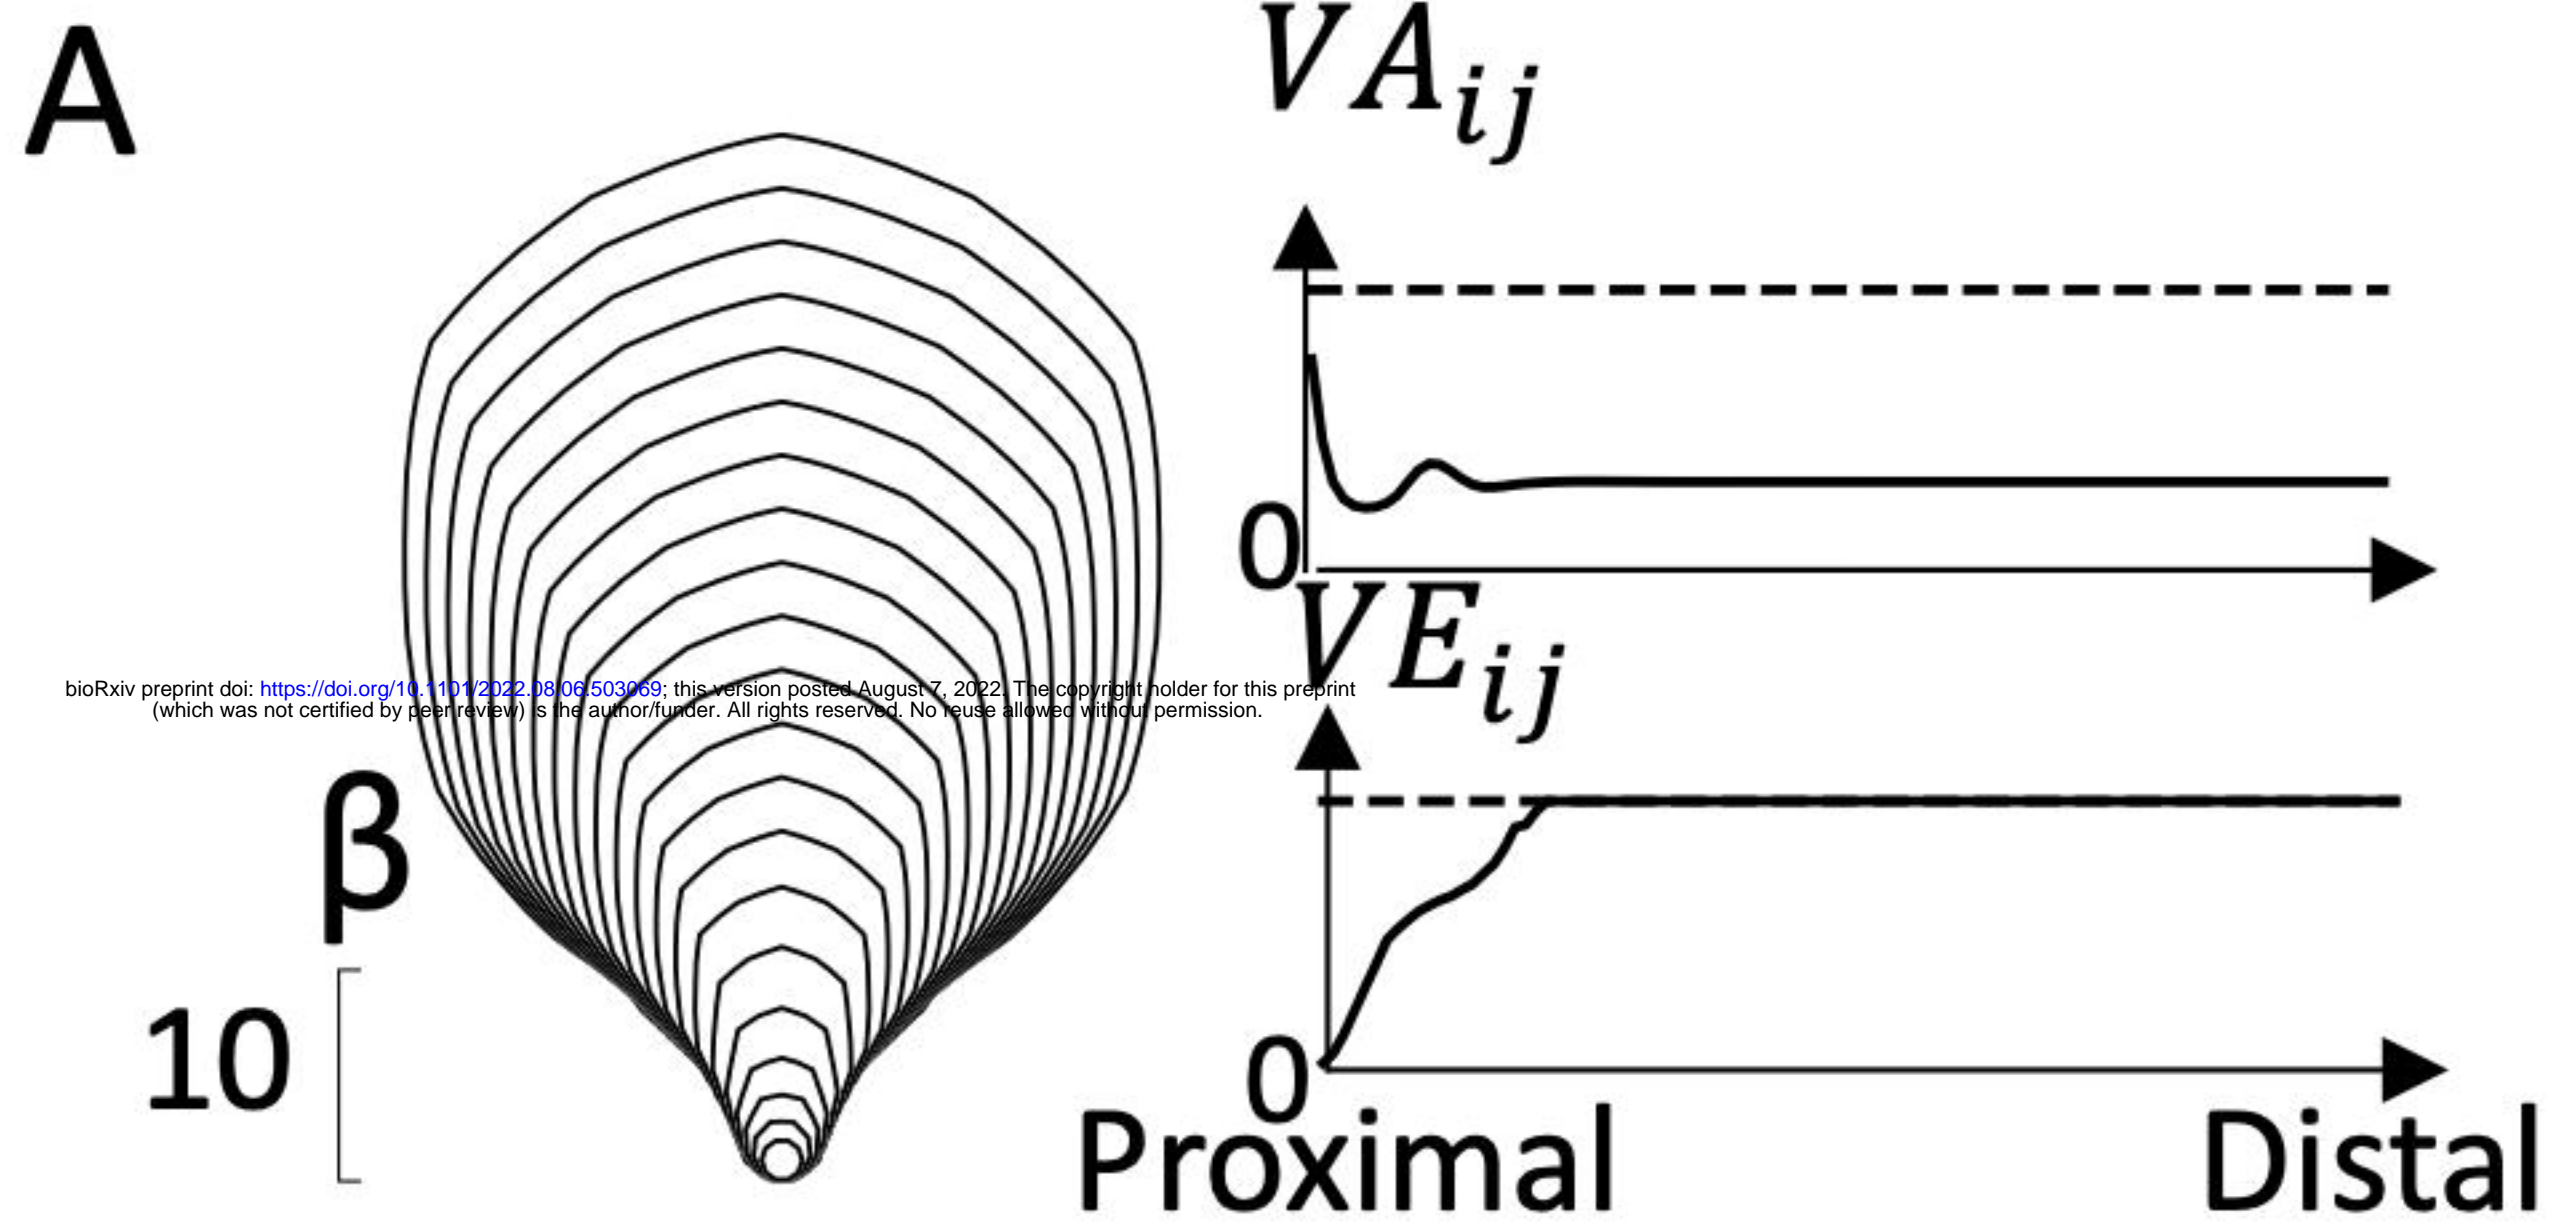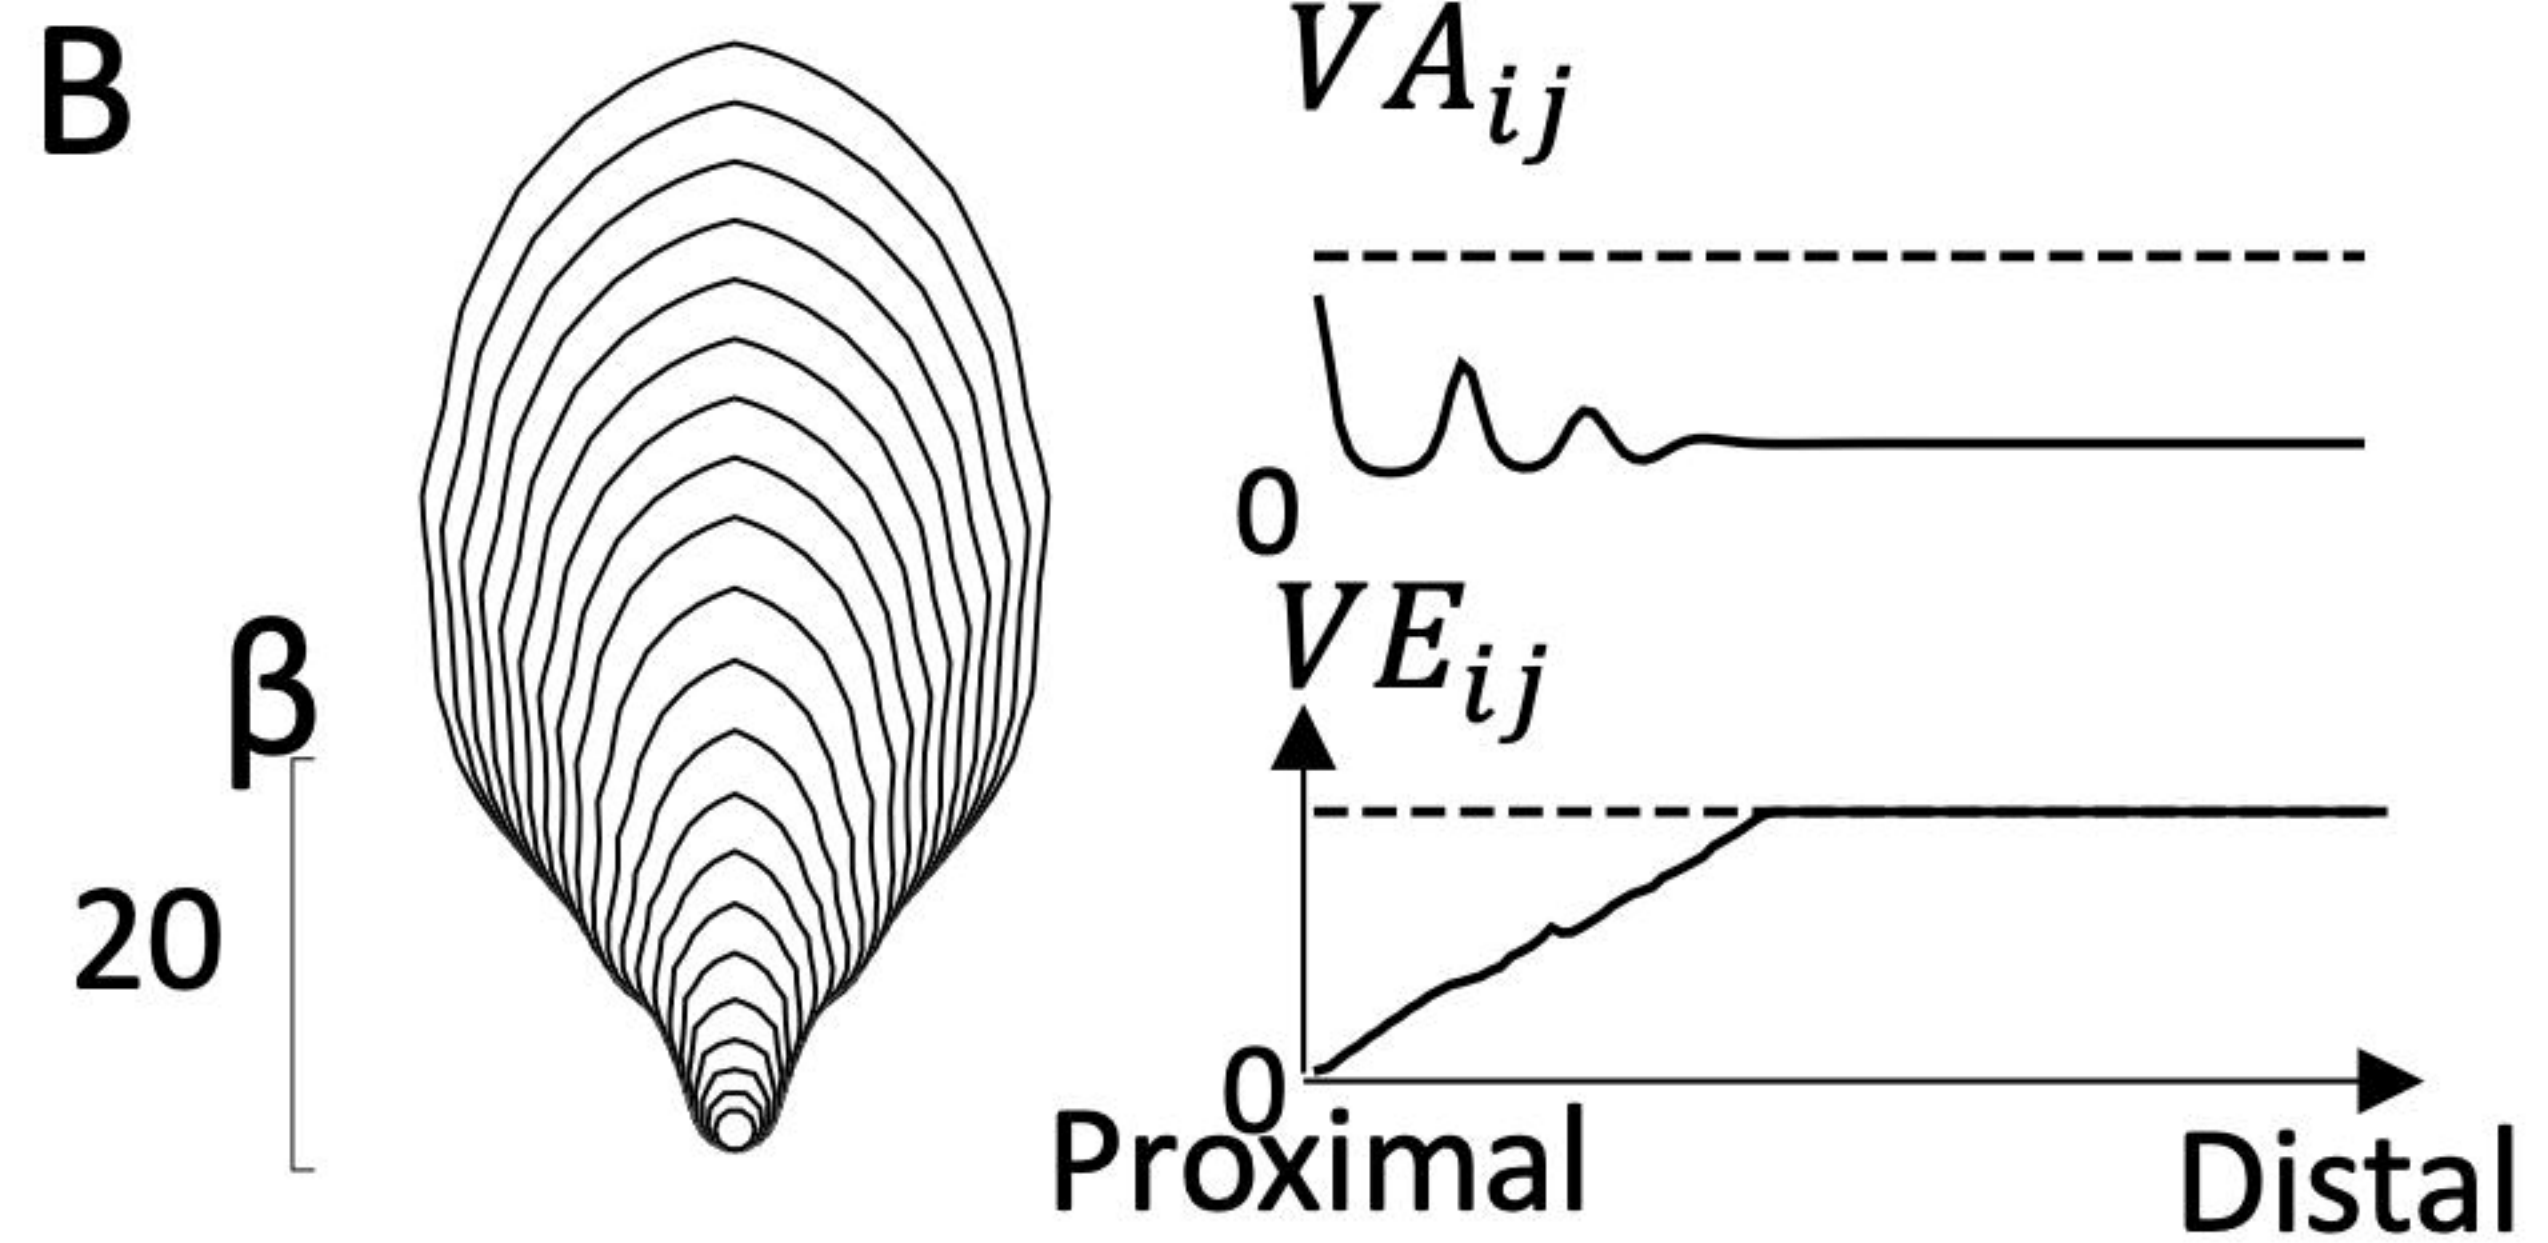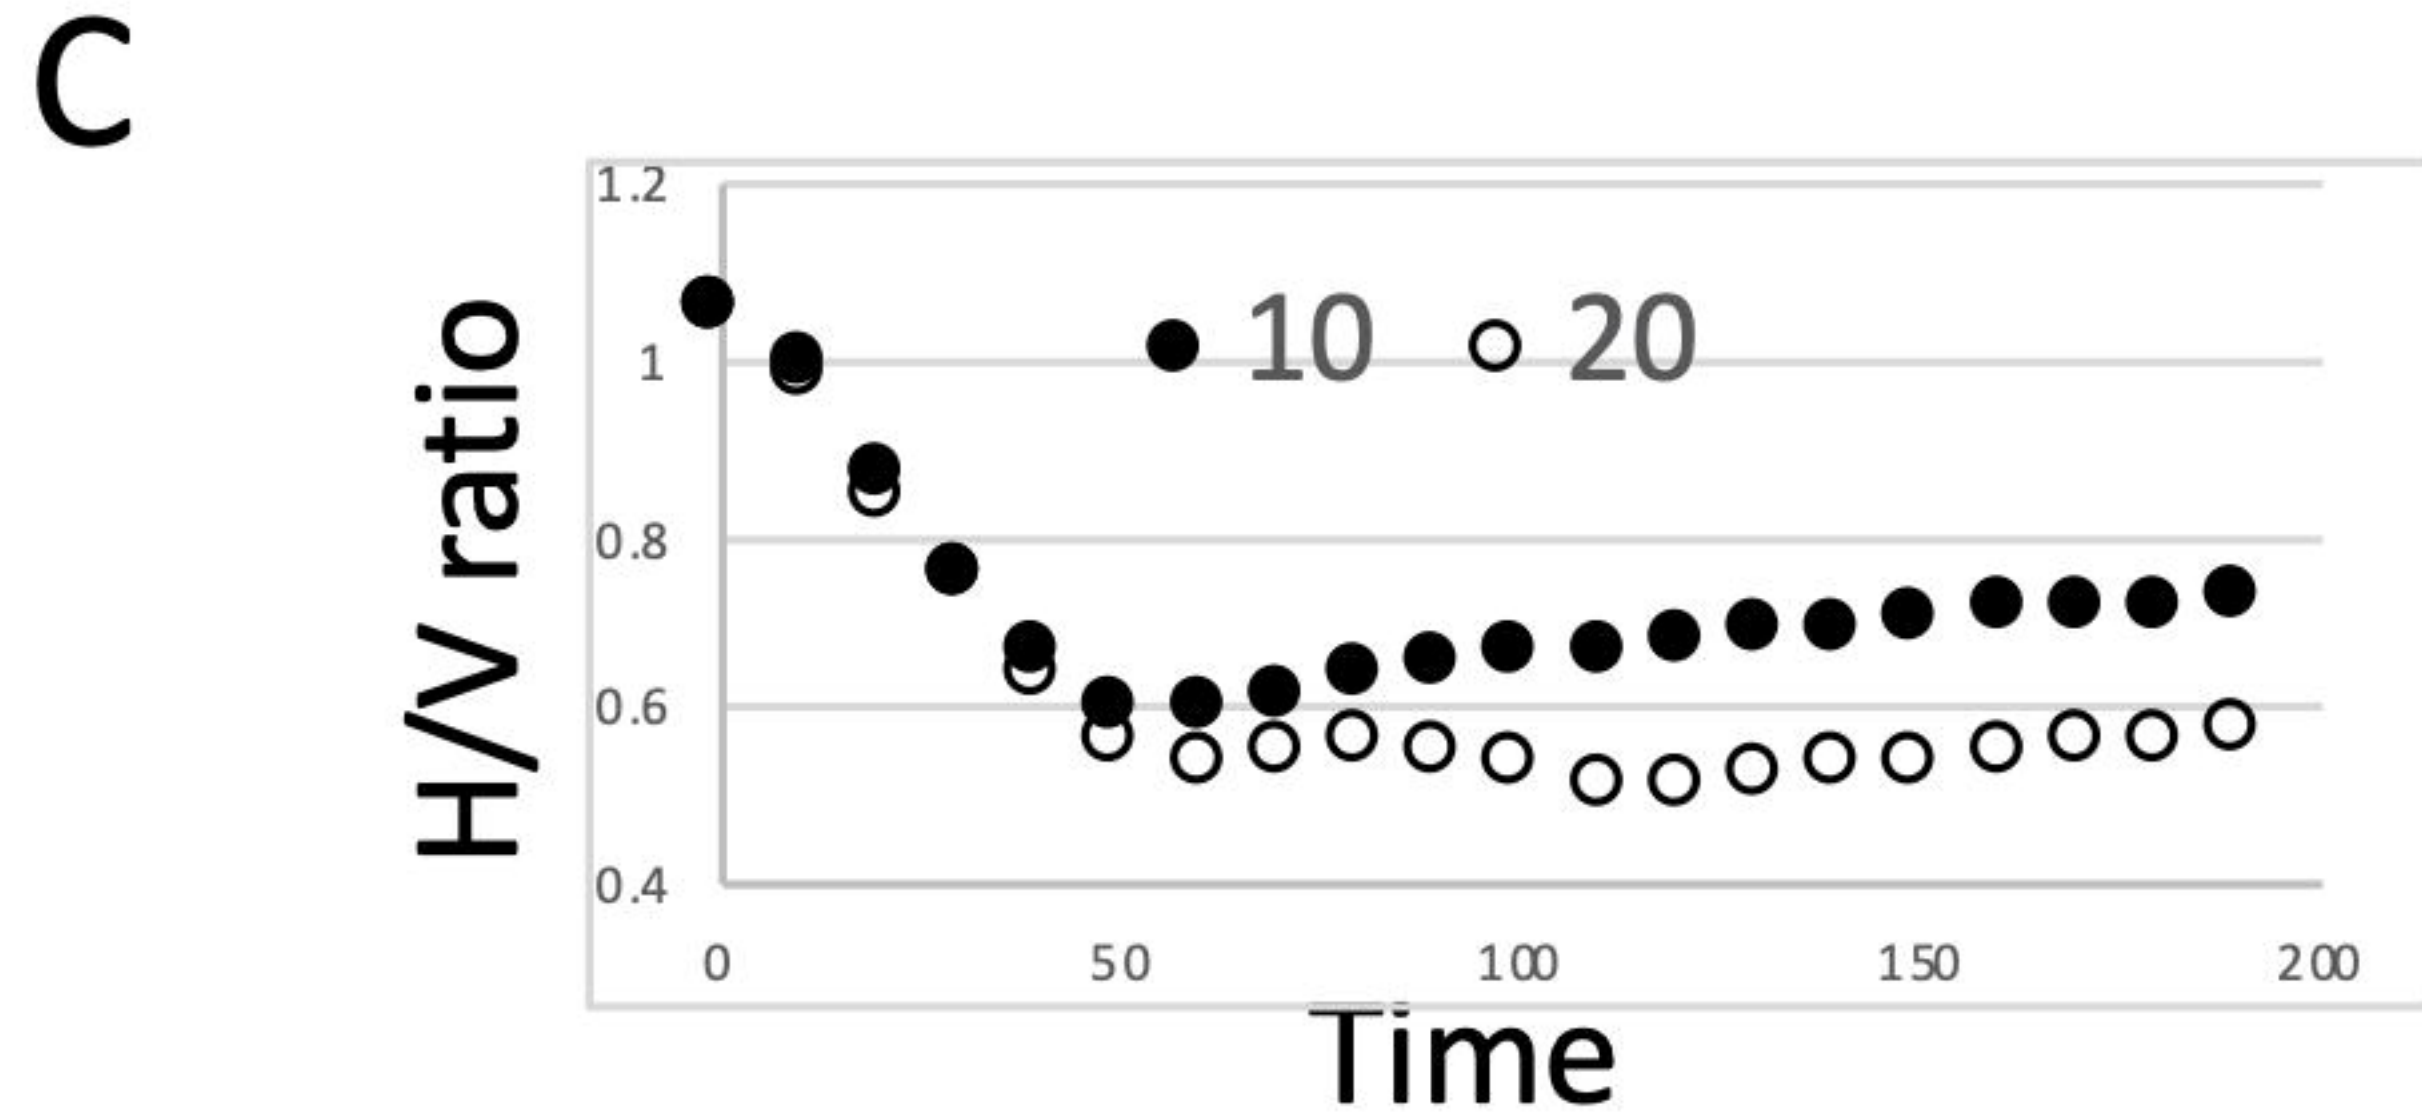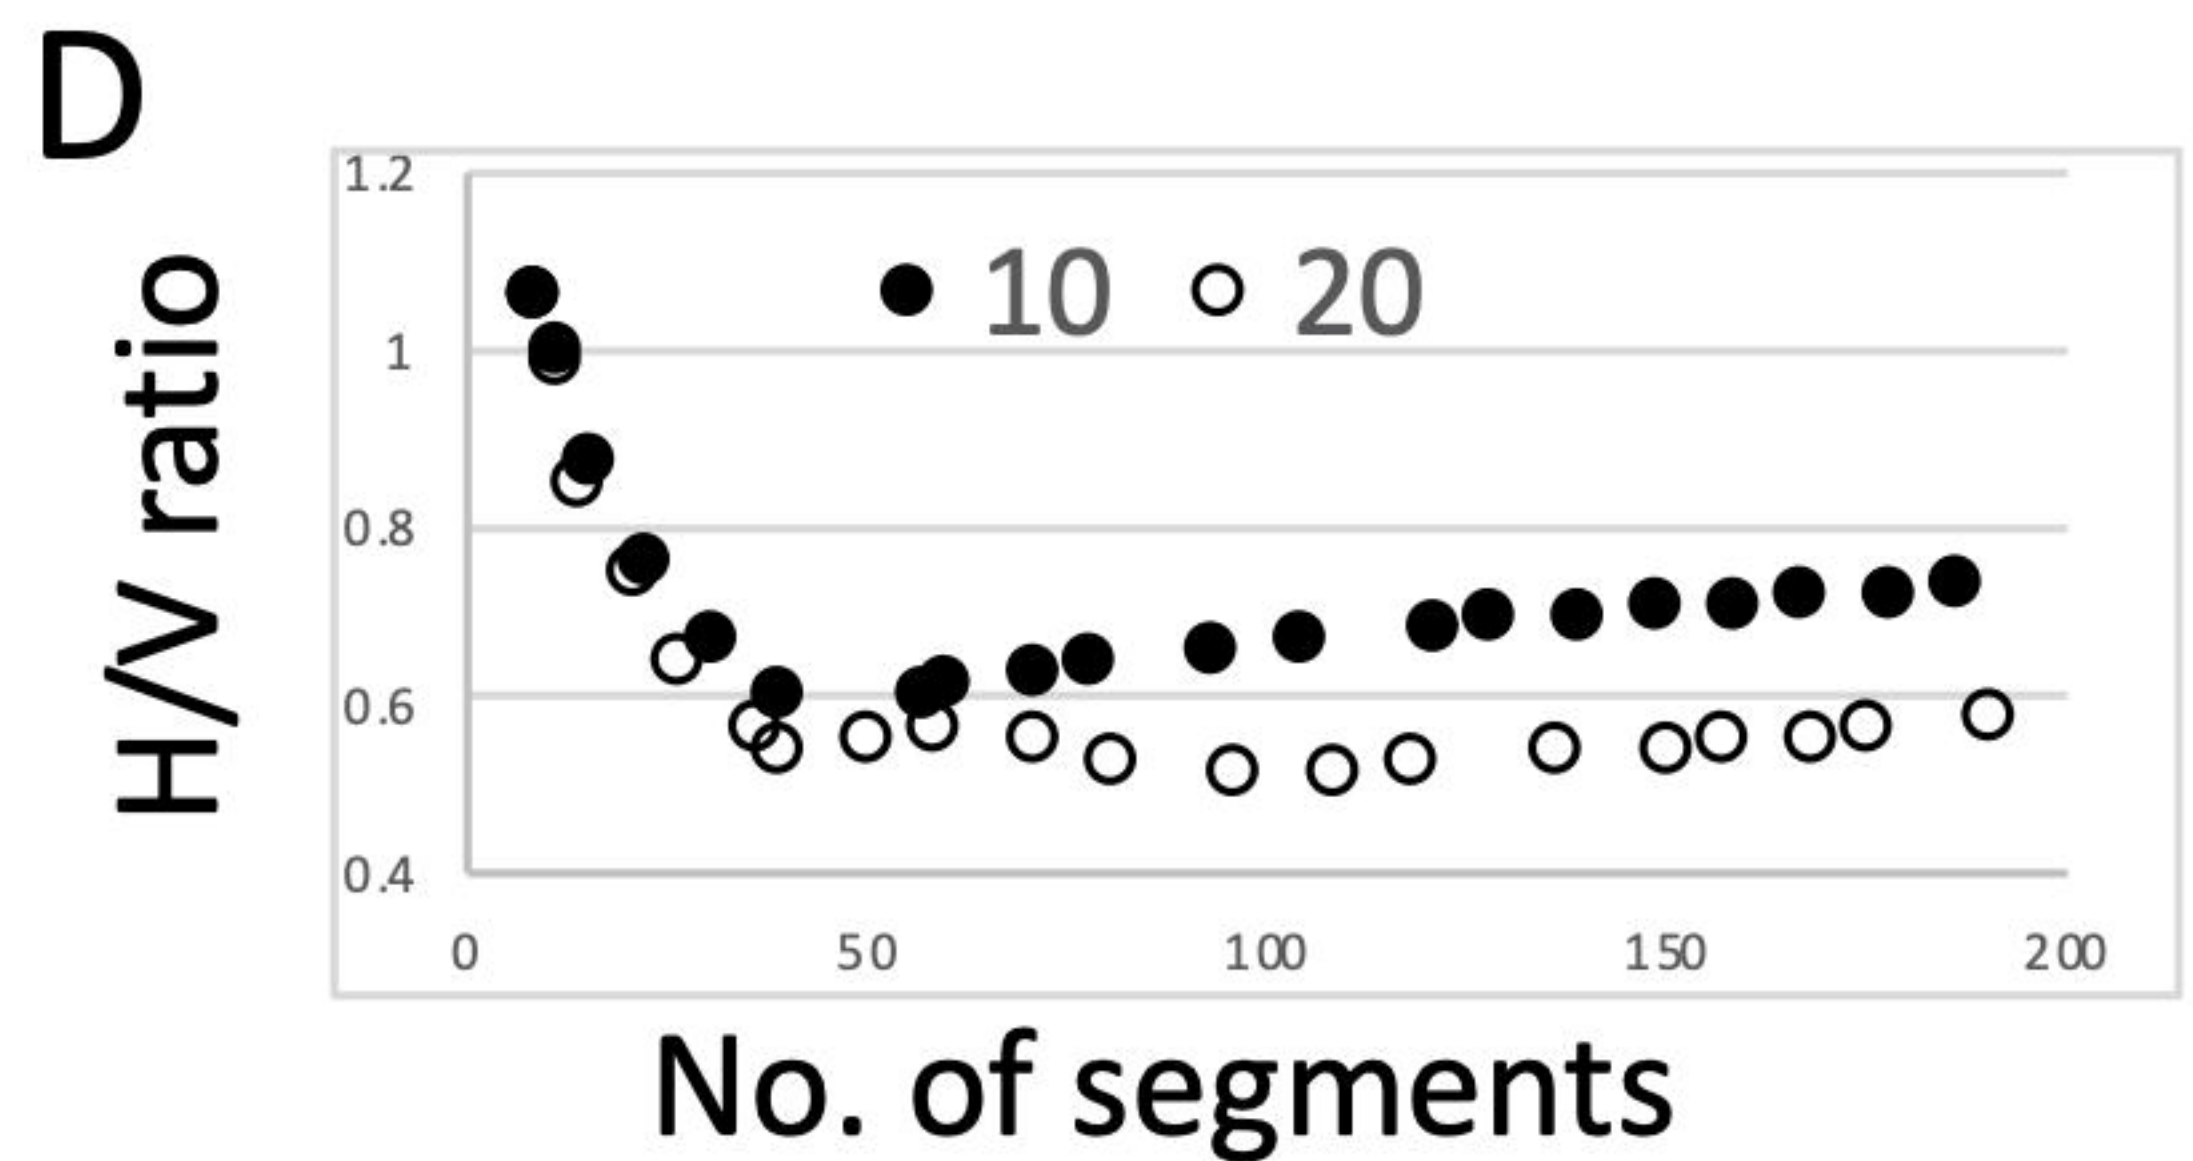

**A**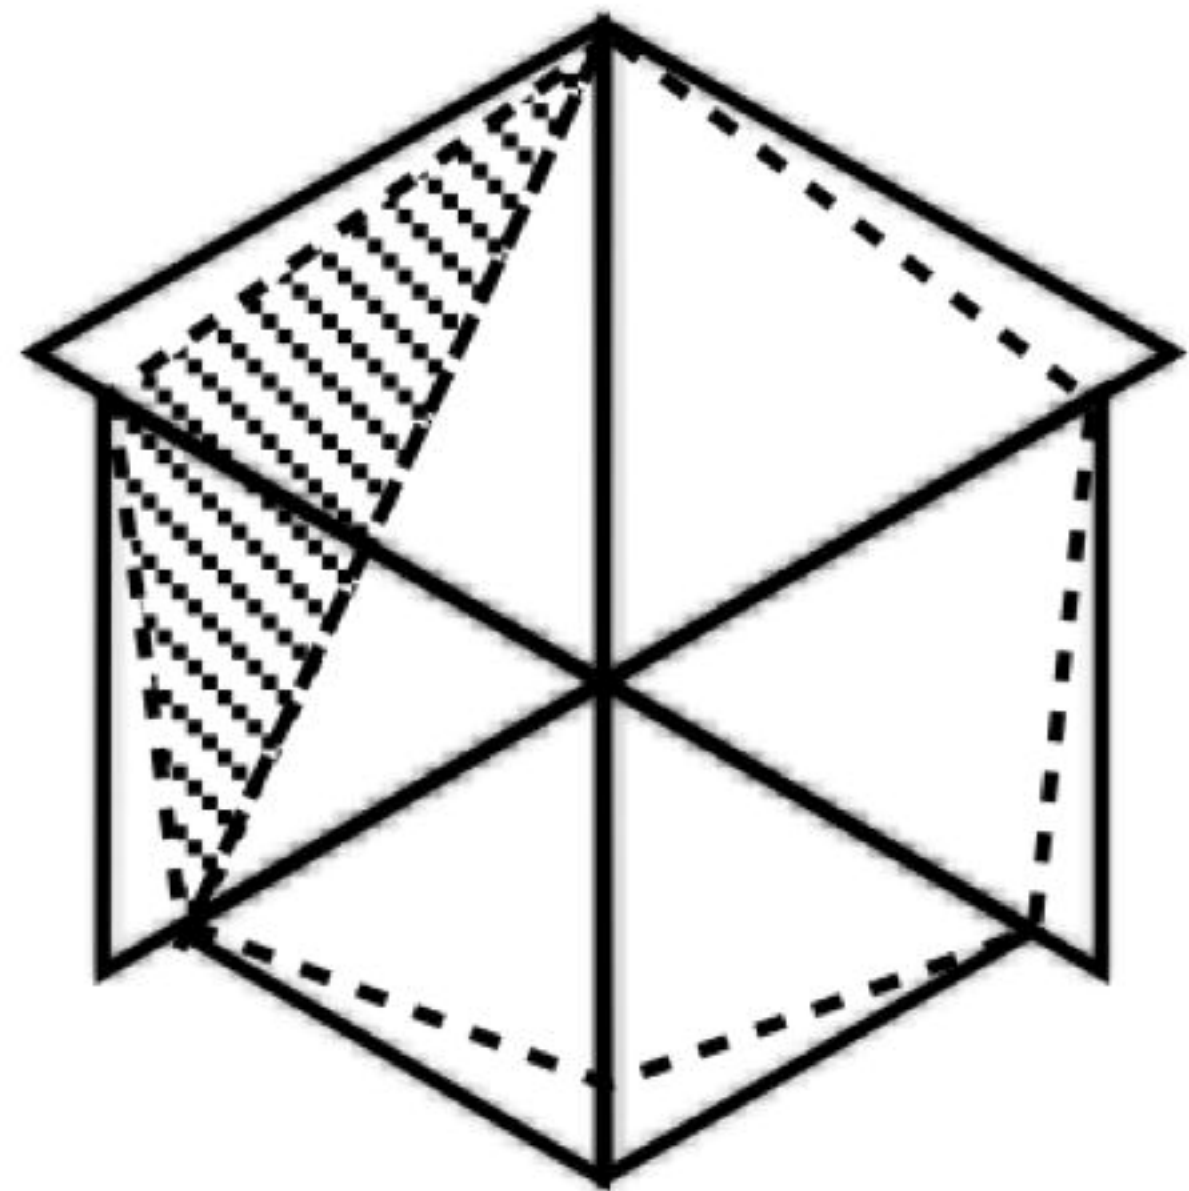**B**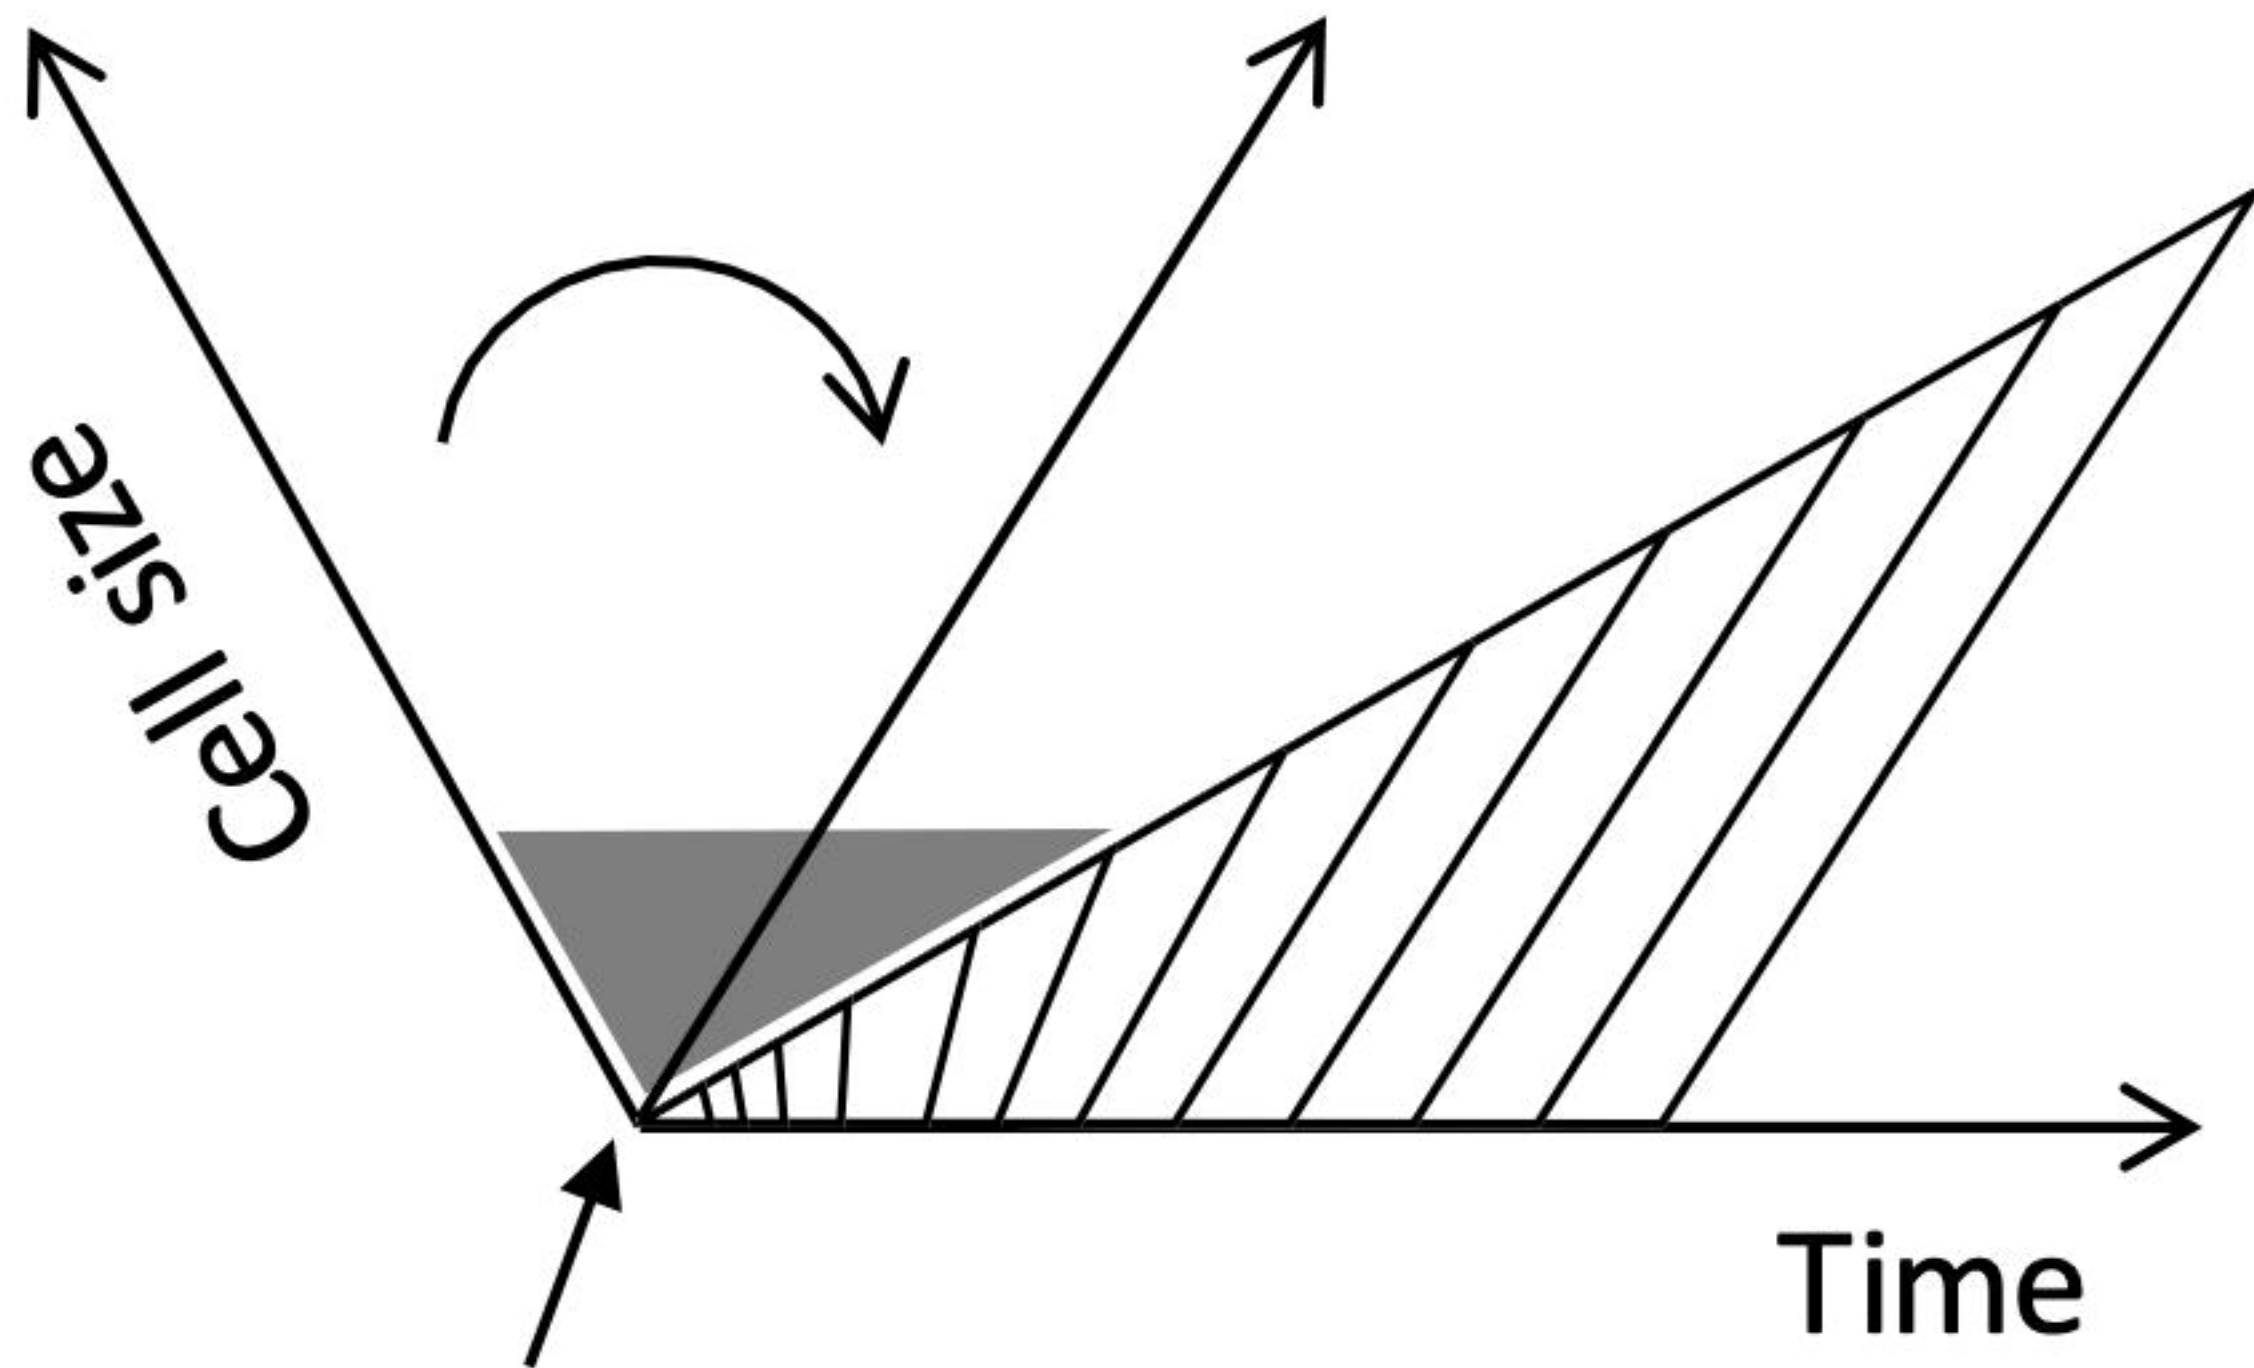

Origin of the geometrical center
